# Supplementary material for: Iron Chelation Therapy Elicits Innate Immune Control of Metastatic Ovarian Cancer
Source: Research Square preprint supplement (doi:10.21203/rs.3.rs-3399219/v1), 2023-10-25
Supplement: Supplementary file 1 [file 677c7657f052e4919db15cc7.xlsx]

## Sheet: Table S2_Mass spectrometry
Protein IDs	Protein names	Gene names	Fasta headers	Peptides	Sequence coverage [%]	Mol. weight [kDa]	Q-value	Intensity gelband_1	Intensity gelband_2	Intensity gelband_3	Intensity gelband_4	Intensity gelband_5	Intensity gelband_6	Intensity gelband_7	Intensity gelband_8	Total Intensity
P02787;H7C5E8;F8WCI6;F8WEK9;C9JB55;CON__Q2HJF0;F8WC57;CON__Q29443;CON__Q0IIK2	Serotransferrin	TF	sp|P02787|TRFE_HUMAN Serotransferrin OS=Homo sapiens GN=TF PE=1 SV=3	55	63.9	77.063	0	796630	85231000	171870000	30774000000	215640000	225130000	5519400	2402900	31480589930
P01024;M0QYC8;CON__Q2UVX4;M0QXZ3;M0R1Q1;M0R0Q9;O95568	Complement C3;Complement C3 beta chain;C3-beta-c;Complement C3 alpha chain;C3a anaphylatoxin;Acylation stimulating protein;Complement C3b alpha chain;Complement C3c alpha chain fragment 1;Complement C3dg fragment;Complement C3g fragment;Complement C3d fragment;Complement C3f fragment;Complement C3c alpha chain fragment 2	C3	sp|P01024|CO3_HUMAN Complement C3 OS=Homo sapiens GN=C3 PE=1 SV=2	103	63.9	187.15	0	10639000	2860000000	11496000000	422100000	2620300000	175970000	349400000	74296000	18008705000
P01009;A0A024R6I7;P01009-2;A0A0G2JRN3;P01009-3;G3V2B9;G3V544;G3V5R8;G3V387;A0A0B4J278;A0A0G2JPK4;P20848	Alpha-1-antitrypsin;Short peptide from AAT	SERPINA1	sp|P01009|A1AT_HUMAN Alpha-1-antitrypsin OS=Homo sapiens GN=SERPINA1 PE=1 SV=3;tr|A0A024R6I7|A0A024R6I7_HUMAN Alpha-1-antitrypsin OS=Homo sapiens GN=SERPINA1 PE=1 SV=1;sp|P01009-2|A1AT_HUMAN Isoform 2 of Alpha-1-antitrypsin OS=Homo sapiens GN=SERPINA1;tr|A	30	65.3	46.736	0	629970	103630000	34975000	8972100	268810000	9100200000	745400	269280	9518231750
P00450;E9PFZ2;H7C5R1;CON__ENSEMBL:ENSBTAP00000031900;D6RE86;H7C5N5	Ceruloplasmin	CP	sp|P00450|CERU_HUMAN Ceruloplasmin OS=Homo sapiens GN=CP PE=1 SV=1;tr|E9PFZ2|E9PFZ2_HUMAN Ceruloplasmin OS=Homo sapiens GN=CP PE=1 SV=1;tr|H7C5R1|H7C5R1_HUMAN Ceruloplasmin (Fragment) OS=Homo sapiens GN=CP PE=1 SV=1	38	33.4	122.2	0	0	137590000	8852600000	49061000	27155000	39242000	1927500	1799500	9109375000
P01023;CON__ENSEMBL:ENSBTAP00000024146;F8W7L3;H0YFH1;F5H1E8	Alpha-2-macroglobulin	A2M	sp|P01023|A2MG_HUMAN Alpha-2-macroglobulin OS=Homo sapiens GN=A2M PE=1 SV=3	57	45.4	163.29	0	2811700	4848400000	2837800000	50958000	46928000	394820000	206700	0	8181924400
A0A0A0MS08;P01857;A0A0A0MS07	Ig gamma-1 chain C region	IGHG1	tr|A0A0A0MS08|A0A0A0MS08_HUMAN Immunoglobulin heavy constant gamma 1 (Fragment) OS=Homo sapiens GN=IGHG1 PE=1 SV=1;sp|P01857|IGHG1_HUMAN Immunoglobulin heavy constant gamma 1 OS=Homo sapiens GN=IGHG1 PE=1 SV=1;tr|A0A0A0MS07|A0A0A0MS07_HUMAN Immunoglobulin	16	55.1	43.911	0	150810	78700000	77946000	230880000	152290000	6067200000	355210	11951000	6619473020
P01860	Ig gamma-3 chain C region	IGHG3	sp|P01860|IGHG3_HUMAN Immunoglobulin heavy constant gamma 3 OS=Homo sapiens GN=IGHG3 PE=1 SV=2	16	54.4	41.287	0	0	46342000	144630000	193650000	149380000	5409700000	3543800	4980000	5952225800
P04114;A8MUN2;CON__ENSEMBL:ENSBTAP00000032840	Apolipoprotein B-100;Apolipoprotein B-48	APOB	sp|P04114|APOB_HUMAN Apolipoprotein B-100 OS=Homo sapiens GN=APOB PE=1 SV=2	150	35.7	515.6	0	4562500000	602260000	158070000	8006100	0	0	0	0	5330836100
P01834	Ig kappa chain C region	IGKC	sp|P01834|IGKC_HUMAN Immunoglobulin kappa constant OS=Homo sapiens GN=IGKC PE=1 SV=2	9	86	11.765	0	3592300	18546000	33563000	112520000	23443000	14409000	2010100	2449100000	2657183400
P00738;J3QLC9;P00738-2;A0A0C4DGL8;J3QR68;H0Y300;A0A087WU08;H3BS21;P00739;P00739-2;A0A0A0MRD9;J3KRH2;J3KSV1;J3QQI8;H3BMJ7;J3KTC3	Haptoglobin;Haptoglobin alpha chain;Haptoglobin beta chain	HP	sp|P00738|HPT_HUMAN Haptoglobin OS=Homo sapiens GN=HP PE=1 SV=1;tr|J3QLC9|J3QLC9_HUMAN Haptoglobin (Fragment) OS=Homo sapiens GN=HP PE=1 SV=1;sp|P00738-2|HPT_HUMAN Isoform 2 of Haptoglobin OS=Homo sapiens GN=HP;tr|A0A0C4DGL8|A0A0C4DGL8_HUMAN Haptoglobin OS	17	36.7	45.205	0	815470	5750500	4846800	5196200	1134700	1684300	2591800000	712000	2611939970
P02790;Q9BS19	Hemopexin	HPX	sp|P02790|HEMO_HUMAN Hemopexin OS=Homo sapiens GN=HPX PE=1 SV=2;tr|Q9BS19|Q9BS19_HUMAN HPX protein OS=Homo sapiens GN=HPX PE=1 SV=1	21	53.5	51.676	0	0	3579000	0	44787000	2258000000	11673000	0	0	2318039000
P01861;CON__ENSEMBL:ENSBTAP00000024466;CON__ENSEMBL:ENSBTAP00000024462	Ig gamma-4 chain C region	IGHG4	sp|P01861|IGHG4_HUMAN Immunoglobulin heavy constant gamma 4 OS=Homo sapiens GN=IGHG4 PE=1 SV=1	13	60.9	35.94	0	0	8004000	51246000	24802000	33690000	2176900000	1273900	1380800	2297296700
P02675;D6REL8;CON__P02676	Fibrinogen beta chain;Fibrinopeptide B;Fibrinogen beta chain	FGB	sp|P02675|FIBB_HUMAN Fibrinogen beta chain OS=Homo sapiens GN=FGB PE=1 SV=2;tr|D6REL8|D6REL8_HUMAN Fibrinogen beta chain OS=Homo sapiens GN=FGB PE=1 SV=1	21	42.2	55.928	0	747770	18595000	16012000	6095800	17056000	1704000000	514850000	1907500	2279264070
Q14624;B7ZKJ8;Q14624-3;Q14624-2;Q14624-4;H7C0L5;CON__Q3T052	Inter-alpha-trypsin inhibitor heavy chain H4;70 kDa inter-alpha-trypsin inhibitor heavy chain H4;35 kDa inter-alpha-trypsin inhibitor heavy chain H4	ITIH4	sp|Q14624|ITIH4_HUMAN Inter-alpha-trypsin inhibitor heavy chain H4 OS=Homo sapiens GN=ITIH4 PE=1 SV=4;tr|B7ZKJ8|B7ZKJ8_HUMAN ITIH4 protein OS=Homo sapiens GN=ITIH4 PE=1 SV=1;sp|Q14624-3|ITIH4_HUMAN Isoform 3 of Inter-alpha-trypsin inhibitor heavy chain H4	20	23.2	103.36	0	0	16677000	2090100000	81267000	0	6007000	0	0	2194051000
P08603;P08603-2;A0A0D9SG88;Q5TFM2;A0A087WYK9;Q6NSD3;Q02985-2;Q02985	Complement factor H	CFH	sp|P08603|CFAH_HUMAN Complement factor H OS=Homo sapiens GN=CFH PE=1 SV=4	49	44.1	139.09	0	328050	1708200000	233250000	1204200	0	0	321010	0	1943303260
P02679-2;P02679;C9JEU5;C9JC84;C9JPQ9;C9JU00	Fibrinogen gamma chain	FGG	sp|P02679-2|FIBG_HUMAN Isoform Gamma-A of Fibrinogen gamma chain OS=Homo sapiens GN=FGG;sp|P02679|FIBG_HUMAN Fibrinogen gamma chain OS=Homo sapiens GN=FGG PE=1 SV=3;tr|C9JEU5|C9JEU5_HUMAN Fibrinogen gamma chain OS=Homo sapiens GN=FGG PE=1 SV=1;tr|C9JC84|C9	19	49.2	49.496	0	0	46268000	88901000	974920000	44196000	641630000	97990000	3910200	1897815200
A0A140TA49;A0A0G2JPR0			tr|A0A140TA49|A0A140TA49_HUMAN Complement C4-A OS=Homo sapiens GN=C4A PE=1 SV=1;tr|A0A0G2JPR0|A0A0G2JPR0_HUMAN Complement C4-A OS=Homo sapiens GN=C4A PE=1 SV=1	49	30.9	187.79	0	1762500	703120000	609920000	244250000	92939000	182890000	38211000	7589500	1880682000
P01011;G3V595;G3V3A0;P01011-2;A0A087WY93	Alpha-1-antichymotrypsin;Alpha-1-antichymotrypsin His-Pro-less	SERPINA3	sp|P01011|AACT_HUMAN Alpha-1-antichymotrypsin OS=Homo sapiens GN=SERPINA3 PE=1 SV=2;tr|G3V595|G3V595_HUMAN Alpha-1-antichymotrypsin (Fragment) OS=Homo sapiens GN=SERPINA3 PE=1 SV=3;tr|G3V3A0|G3V3A0_HUMAN Alpha-1-antichymotrypsin OS=Homo sapiens GN=SERPINA3	20	49.2	47.65	0	0	27399000	9677600	22283000	702910000	733720000	0	7324000	1503313600
Q5T985;P19823;Q5T987;CON__Q9TRI1	Inter-alpha-trypsin inhibitor heavy chain H2	ITIH2	tr|Q5T985|Q5T985_HUMAN Inter-alpha-trypsin inhibitor heavy chain H2 OS=Homo sapiens GN=ITIH2 PE=1 SV=1;sp|P19823|ITIH2_HUMAN Inter-alpha-trypsin inhibitor heavy chain H2 OS=Homo sapiens GN=ITIH2 PE=1 SV=2	23	22.6	105.21	0	1923400	965880000	391140000	45545000	1278200	1576700	0	0	1407343300
P01031;CON__Q1A7A4	Complement C5;Complement C5 beta chain;Complement C5 alpha chain;C5a anaphylatoxin;Complement C5 alpha chain	C5	sp|P01031|CO5_HUMAN Complement C5 OS=Homo sapiens GN=C5 PE=1 SV=4	39	23.3	188.3	0	0	8140100	1051100000	2430100	66270000	1534100	0	0	1129474300
P02774;P02774-3;D6RF35;P02774-2;D6RBJ7;D6RF20;CON__Q3MHN5;CON__ENSEMBL:ENSBTAP00000018229	Vitamin D-binding protein	GC	sp|P02774|VTDB_HUMAN Vitamin D-binding protein OS=Homo sapiens GN=GC PE=1 SV=1;sp|P02774-3|VTDB_HUMAN Isoform 3 of Vitamin D-binding protein OS=Homo sapiens GN=GC;tr|D6RF35|D6RF35_HUMAN Vitamin D-binding protein OS=Homo sapiens GN=GC PE=1 SV=1;sp|P02774-2|	16	30.2	52.963	0	0	1189000	2085000	3072500	9976900	1059100000	0	0	1075423400
P19827;P19827-2;F8WAS2;P19827-3;H7C0N0;CON__Q0VCM5	Inter-alpha-trypsin inhibitor heavy chain H1	ITIH1	sp|P19827|ITIH1_HUMAN Inter-alpha-trypsin inhibitor heavy chain H1 OS=Homo sapiens GN=ITIH1 PE=1 SV=3;sp|P19827-2|ITIH1_HUMAN Isoform 2 of Inter-alpha-trypsin inhibitor heavy chain H1 OS=Homo sapiens GN=ITIH1	17	22.1	101.39	0	6502200	561740000	472160000	12898000	0	0	0	1255400	1054555600
P01876	Ig alpha-1 chain C region	IGHA1	sp|P01876|IGHA1_HUMAN Immunoglobulin heavy constant alpha 1 OS=Homo sapiens GN=IGHA1 PE=1 SV=2	12	45.3	37.654	0	2348500	63085000	309950000	43703000	324680000	260360000	1076500	550000	1005753000
P02647;F8W696	Apolipoprotein A-I;Proapolipoprotein A-I;Truncated apolipoprotein A-I	APOA1	sp|P02647|APOA1_HUMAN Apolipoprotein A-I OS=Homo sapiens GN=APOA1 PE=1 SV=1;tr|F8W696|F8W696_HUMAN Apolipoprotein A-I OS=Homo sapiens GN=APOA1 PE=1 SV=1	22	64.8	30.777	0	0	48339000	43494000	17010000	4348500	2259800	539420	659200000	775190720
A0A1B0GUU9;P01871;P01871-2;P04220	Ig mu chain C region;Ig mu heavy chain disease protein	IGHM	tr|A0A1B0GUU9|A0A1B0GUU9_HUMAN Immunoglobulin heavy constant mu (Fragment) OS=Homo sapiens GN=IGHM PE=1 SV=1;sp|P01871|IGHM_HUMAN Immunoglobulin heavy constant mu OS=Homo sapiens GN=IGHM PE=1 SV=4;sp|P01871-2|IGHM_HUMAN Isoform 2 of Immunoglobulin heavy co	12	26.2	51.923	0	0	6105600	8401100	596680000	715520	12017000	0	0	623919220
P02671-2;P02671;A0A087WUA0	Fibrinogen alpha chain;Fibrinopeptide A;Fibrinogen alpha chain	FGA	sp|P02671-2|FIBA_HUMAN Isoform 2 of Fibrinogen alpha chain OS=Homo sapiens GN=FGA;sp|P02671|FIBA_HUMAN Fibrinogen alpha chain OS=Homo sapiens GN=FGA PE=1 SV=2	26	48.8	69.756	0	839830	68661000	204140000	38452000	160710000	53409000	23071000	37029000	586311830
P01619;A0A0C4DH25	Ig kappa chain V-III region B6	IGKV3D-20	sp|P01619|KV320_HUMAN Immunoglobulin kappa variable 3-20 OS=Homo sapiens GN=IGKV3-20 PE=1 SV=2;sp|A0A0C4DH25|KVD20_HUMAN Immunoglobulin kappa variable 3D-20 OS=Homo sapiens GN=IGKV3D-20 PE=3 SV=1	4	46.6	12.557	0	235460	1457000	0	7948800	0	0	0	539240000	548881260
P0DOY3;P0DOY2;P0CF74	Ig lambda-6 chain C region	IGLC6	sp|P0DOY3|IGLC3_HUMAN Immunoglobulin lambda constant 3 OS=Homo sapiens GN=IGLC3 PE=1 SV=1;sp|P0DOY2|IGLC2_HUMAN Immunoglobulin lambda constant 2 OS=Homo sapiens GN=IGLC2 PE=1 SV=1;sp|P0CF74|IGLC6_HUMAN Immunoglobulin lambda constant 6 OS=Homo sapiens GN=IG	4	55.7	11.265	0	2589000	19004000	31136000	217010000	3227400	11410000	5002500	215620000	504998900
A0A0B4J1X5;A0A0B4J1V1;P01763;P01762;A0A075B7F0;A0A0J9YVY3	Ig heavy chain V-III region WEA;Ig heavy chain V-III region TRO	IGHV3-74;IGHV3-21	sp|A0A0B4J1X5|HV374_HUMAN Immunoglobulin heavy variable 3-74 OS=Homo sapiens GN=IGHV3-74 PE=3 SV=1;sp|A0A0B4J1V1|HV321_HUMAN Immunoglobulin heavy variable 3-21 OS=Homo sapiens GN=IGHV3-21 PE=1 SV=1;sp|P01763|HV348_HUMAN Immunoglobulin heavy variable 3-48 O	3	29.9	12.839	0	0	4620300	11239000	25684000	0	369410000	326850	907640	412187790
E9PGN7;P05155-2;P05155;P05155-3;H9KV48	Plasma protease C1 inhibitor	SERPING1	tr|E9PGN7|E9PGN7_HUMAN Plasma protease C1 inhibitor OS=Homo sapiens GN=SERPING1 PE=1 SV=1;sp|P05155-2|IC1_HUMAN Isoform 2 of Plasma protease C1 inhibitor OS=Homo sapiens GN=SERPING1;sp|P05155|IC1_HUMAN Plasma protease C1 inhibitor OS=Homo sapiens GN=SERPIN	9	16	59.491	0	0	36279000	138680000	229950000	0	0	0	0	404909000
P01042-2;P01042;P01042-3	Kininogen-1;Kininogen-1 heavy chain;T-kinin;Bradykinin;Lysyl-bradykinin;Kininogen-1 light chain;Low molecular weight growth-promoting factor	KNG1	sp|P01042-2|KNG1_HUMAN Isoform LMW of Kininogen-1 OS=Homo sapiens GN=KNG1;sp|P01042|KNG1_HUMAN Kininogen-1 OS=Homo sapiens GN=KNG1 PE=1 SV=2;sp|P01042-3|KNG1_HUMAN Isoform 3 of Kininogen-1 OS=Homo sapiens GN=KNG1	21	46.6	47.883	0	0	587110	30590000	839530	222280000	60588000	0	0	314884640
B4E1Z4;E7ETN3;P00751;H7C5H1;A0A0G2JH38;P00751-2;A0A0G2JIE7;H0Y3H6;P06681-2;C9JRT3;A0A0G2JHM4;A0A0G2JJ82;F2Z3N2;Q8N6L6;H7C526;F8WCJ9;A0A0G2JJM0;A0A0G2JI59;C9JYQ5;Q5ST52;A2ABG0	Complement factor B;Complement factor B Ba fragment;Complement factor B Bb fragment	CFB	tr|B4E1Z4|B4E1Z4_HUMAN cDNA FLJ55673, highly similar to Complement factor B (EC 3.4.21.47) OS=Homo sapiens PE=1 SV=1;tr|E7ETN3|E7ETN3_HUMAN Uncharacterized protein OS=Homo sapiens PE=1 SV=1;sp|P00751|CFAB_HUMAN Complement factor B OS=Homo sapiens GN=CFB PE	29	23.7	140.94	0	0	84267000	82320000	15599000	112010000	6740500	0	0	300936500
P04259	Keratin, type II cytoskeletal 6B	KRT6B	sp|P04259|K2C6B_HUMAN Keratin, type II cytoskeletal 6B OS=Homo sapiens GN=KRT6B PE=1 SV=5	31	42.2	60.066	0	5985300	21672000	253630000	445640	0	16453000	0	1981600	300167540
P01008;Q8TCE1;CON__P41361	Antithrombin-III	SERPINC1	sp|P01008|ANT3_HUMAN Antithrombin-III OS=Homo sapiens GN=SERPINC1 PE=1 SV=1	18	32.3	52.602	0	0	0	0	3771500	1876800	278890000	0	0	284538300
P04217;P04217-2;M0R009	Alpha-1B-glycoprotein	A1BG	sp|P04217|A1BG_HUMAN Alpha-1B-glycoprotein OS=Homo sapiens GN=A1BG PE=1 SV=4;sp|P04217-2|A1BG_HUMAN Isoform 2 of Alpha-1B-glycoprotein OS=Homo sapiens GN=A1BG;tr|M0R009|M0R009_HUMAN Alpha-1B-glycoprotein (Fragment) OS=Homo sapiens GN=A1BG PE=1 SV=8	15	47.1	54.253	0	0	1257100	567660	18933000	259380000	0	0	0	280137760
P0DP08;P0DP06;A0A0C4DH41;P01825;P06331;P01824;A0A0J9YWU9;P0DP07;A0A087WSY4	Ig heavy chain V-II region NEWM;Ig heavy chain V-II region ARH-77;Ig heavy chain V-II region WAH	IGHV4-61;IGHV4-31	sp|P0DP08|HVD82_HUMAN Immunoglobulin heavy variable 4-38-2 OS=Homo sapiens GN=IGHV4-38-2 PE=3 SV=1;sp|P0DP06|HVD34_HUMAN Immunoglobulin heavy variable 4-30-4 OS=Homo sapiens GN=IGHV4-30-4 PE=3 SV=1;sp|A0A0C4DH41|HV461_HUMAN Immunoglobulin heavy variable 4-	2	21.4	13.016	0	0	2442400	5665500	8410400	0	251420000	0	0	267938300
A0A0B4J231;B9A064;P0CG04	Immunoglobulin lambda-like polypeptide 5;Ig lambda-1 chain C regions	IGLL5;IGLC1	tr|A0A0B4J231|A0A0B4J231_HUMAN Immunoglobulin lambda-like polypeptide 5 OS=Homo sapiens GN=IGLL5 PE=1 SV=1;sp|B9A064|IGLL5_HUMAN Immunoglobulin lambda-like polypeptide 5 OS=Homo sapiens GN=IGLL5 PE=2 SV=2;sp|P0CG04|IGLC1_HUMAN Immunoglobulin lambda constan	5	31.2	23.15	0	0	11753000	8914800	156290000	8116700	1596100	0	71324000	257994600
C9JV77;P02765	Alpha-2-HS-glycoprotein;Alpha-2-HS-glycoprotein chain A;Alpha-2-HS-glycoprotein chain B	AHSG	tr|C9JV77|C9JV77_HUMAN Alpha-2-HS-glycoprotein OS=Homo sapiens GN=AHSG PE=1 SV=1;sp|P02765|FETUA_HUMAN Alpha-2-HS-glycoprotein OS=Homo sapiens GN=AHSG PE=1 SV=1	2	6.5	39.411	0	0	5428600	2999800	0	0	236490000	0	0	244918400
P02749;J3QRN2;J3KS17;J3QLI0;CON__P17690	Beta-2-glycoprotein 1	APOH	sp|P02749|APOH_HUMAN Beta-2-glycoprotein 1 OS=Homo sapiens GN=APOH PE=1 SV=3	5	14.5	38.298	0	0	2557300	7121200	2361300	721860	221860000	721290	0	235342950
A0A0A0MRZ8;P04433	Ig kappa chain V-III region VG	IGKV3D-11	sp|A0A0A0MRZ8|KVD11_HUMAN Immunoglobulin kappa variable 3D-11 OS=Homo sapiens GN=IGKV3D-11 PE=3 SV=6;sp|P04433|KV311_HUMAN Immunoglobulin kappa variable 3-11 OS=Homo sapiens GN=IGKV3-11 PE=1 SV=1	3	32.2	12.625	0	0	887530	1766900	8602500	0	0	0	223710000	234966930
P01624;A0A087WSY6;A0A0C4DH90;A0A0C4DH55;A0A075B6H7	Ig kappa chain V-III region POM	IGKV3D-15;IGKV3OR2-268;IGKV3D-7	sp|P01624|KV315_HUMAN Immunoglobulin kappa variable 3-15 OS=Homo sapiens GN=IGKV3-15 PE=1 SV=2;sp|A0A087WSY6|KVD15_HUMAN Immunoglobulin kappa variable 3D-15 OS=Homo sapiens GN=IGKV3D-15 PE=3 SV=6;tr|A0A0C4DH90|A0A0C4DH90_HUMAN Immunoglobulin kappa variable	3	32.2	12.496	0	0	969190	0	4203400	0	0	0	221080000	226252590
P04003;A6PVY5;F2Z2V7	C4b-binding protein alpha chain	C4BPA	sp|P04003|C4BPA_HUMAN C4b-binding protein alpha chain OS=Homo sapiens GN=C4BPA PE=1 SV=2	21	41.7	67.033	0	0	3373400	19297000	146500000	49164000	0	1334700	0	219669100
P02748;CON__Q3MHN2	Complement component C9;Complement component C9a;Complement component C9b	C9	sp|P02748|CO9_HUMAN Complement component C9 OS=Homo sapiens GN=C9 PE=1 SV=2	12	20.2	63.173	0	0	0	4876700	12906000	159650000	19046000	0	0	196478700
P02751-5;P02751-17;P02751-3;P02751;P02751-10;P02751-6;P02751-9;P02751-14;P02751-8;P02751-11;P02751-7;P02751-15;P02751-13;P02751-4;P02751-12;H0Y7Z1;P02751-16;P02751-2;H0Y4K8	Fibronectin;Anastellin;Ugl-Y1;Ugl-Y2;Ugl-Y3	FN1	sp|P02751-5|FINC_HUMAN Isoform 5 of Fibronectin OS=Homo sapiens GN=FN1;sp|P02751-17|FINC_HUMAN Isoform 17 of Fibronectin OS=Homo sapiens GN=FN1;sp|P02751-3|FINC_HUMAN Isoform 3 of Fibronectin OS=Homo sapiens GN=FN1;sp|P02751|FINC_HUMAN Fibronectin OS=Homo	34	19.8	243.33	0	616820	153490000	15534000	3591300	0	441940	0	0	173674060
A2NJV5;A0A075B6S2		IGKV A18;IGKV2D-29	sp|A2NJV5|KV229_HUMAN Immunoglobulin kappa variable 2-29 OS=Homo sapiens GN=IGKV2-29 PE=3 SV=2;sp|A0A075B6S2|KVD29_HUMAN Immunoglobulin kappa variable 2D-29 OS=Homo sapiens GN=IGKV2D-29 PE=3 SV=1	2	20	13.085	0	0	1479200	0	7862400	0	0	0	160090000	169431600
P01742;P0DP01;A0A0C4DH29;A0A0B4J2H0;P01743	Ig heavy chain V-I region EU;Ig heavy chain V-I region HG3	IGHV1-3;IGHV1-69-2	sp|P01742|HV169_HUMAN Immunoglobulin heavy variable 1-69 OS=Homo sapiens GN=IGHV1-69 PE=1 SV=2;sp|P0DP01|HV108_HUMAN Immunoglobulin heavy variable 1-8 OS=Homo sapiens GN=IGHV1-8 PE=3 SV=1;sp|A0A0C4DH29|HV103_HUMAN Immunoglobulin heavy variable 1-3 OS=Homo	2	20.5	12.659	0	0	1548700	2360700	6080400	0	153690000	0	0	163679800
P02760;S4R471;S4R3Y4;CON__P00978	Protein AMBP;Alpha-1-microglobulin;Inter-alpha-trypsin inhibitor light chain;Trypstatin	AMBP	sp|P02760|AMBP_HUMAN Protein AMBP OS=Homo sapiens GN=AMBP PE=1 SV=1	10	30.4	38.999	0	0	73602000	83011000	946080	0	0	0	0	157559080
P13671	Complement component C6	C6	sp|P13671|CO6_HUMAN Complement component C6 OS=Homo sapiens GN=C6 PE=1 SV=3	14	14.6	104.79	0	0	573070	150400000	1407500	0	0	0	0	152380570
P01602	Ig kappa chain V-I region HK102	IGKV1-5	sp|P01602|KV105_HUMAN Immunoglobulin kappa variable 1-5 OS=Homo sapiens GN=IGKV1-5 PE=1 SV=2	1	9.4	12.781	0	0	0	0	5435500	0	0	0	126560000	131995500
A0A0C4DH31;P23083	Ig heavy chain V-I region V35	IGHV1-18	sp|A0A0C4DH31|HV118_HUMAN Immunoglobulin heavy variable 1-18 OS=Homo sapiens GN=IGHV1-18 PE=3 SV=1;sp|P23083|HV102_HUMAN Immunoglobulin heavy variable 1-2 OS=Homo sapiens GN=IGHV1-2 PE=1 SV=2	2	23.9	12.82	0	0	0	736940	4177200	0	122880000	0	325030	128119170
P43652	Afamin	AFM	sp|P43652|AFAM_HUMAN Afamin OS=Homo sapiens GN=AFM PE=1 SV=1	11	19	69.068	0	0	0	0	127950000	0	0	0	0	127950000
A0A075B7B8		IGHV3OR16-12	tr|A0A075B7B8|A0A075B7B8_HUMAN Immunoglobulin heavy variable 3/OR16-12 (non-functional) (Fragment) OS=Homo sapiens GN=IGHV3OR16-12 PE=1 SV=1	2	17.1	12.874	0	0	1556100	2957300	7000900	0	108020000	0	0	119534300
A0A0B4J1Y9;A0A075B7D8		IGHV3-72	sp|A0A0B4J1Y9|HV372_HUMAN Immunoglobulin heavy variable 3-72 OS=Homo sapiens GN=IGHV3-72 PE=3 SV=1	3	26.1	13.203	0	0	0	0	950780	0	101450000	0	0	102400780
P0DP03;A0A0J9YY99;P01768;P01764	Ig heavy chain V-III region CAM;Ig heavy chain V-III region 23	IGHV3-23	sp|P0DP03|HV335_HUMAN Immunoglobulin heavy variable 3-30-5 OS=Homo sapiens GN=IGHV3-30-5 PE=3 SV=1;tr|A0A0J9YY99|A0A0J9YY99_HUMAN Uncharacterized protein (Fragment) OS=Homo sapiens PE=1 SV=1;sp|P01768|HV330_HUMAN Immunoglobulin heavy variable 3-30 OS=Homo	3	28.2	12.947	0	0	1243600	3158200	5362600	0	85077000	0	0	94841400
Q06033-2;Q06033;A0A087WW43;E7ET33;CON__Q0V8M9	Inter-alpha-trypsin inhibitor heavy chain H3	ITIH3	sp|Q06033-2|ITIH3_HUMAN Isoform 2 of Inter-alpha-trypsin inhibitor heavy chain H3 OS=Homo sapiens GN=ITIH3;sp|Q06033|ITIH3_HUMAN Inter-alpha-trypsin inhibitor heavy chain H3 OS=Homo sapiens GN=ITIH3 PE=1 SV=2;tr|A0A087WW43|A0A087WW43_HUMAN Inter-alpha-tryp	9	12.9	99.326	0	0	3100200	89098000	0	0	0	0	0	92198200
H0YAC1;P03952;E9PBC5;C9JCT1;C9J075	Plasma kallikrein;Plasma kallikrein heavy chain;Plasma kallikrein light chain	KLKB1	tr|H0YAC1|H0YAC1_HUMAN Plasma kallikrein (Fragment) OS=Homo sapiens GN=KLKB1 PE=1 SV=1;sp|P03952|KLKB1_HUMAN Plasma kallikrein OS=Homo sapiens GN=KLKB1 PE=1 SV=1;tr|E9PBC5|E9PBC5_HUMAN Plasma kallikrein OS=Homo sapiens GN=KLKB1 PE=1 SV=2	15	24.1	76.773	0	0	0	0	91148000	0	0	0	0	91148000
P00747;CON__P06868;Q5TEH5;A6PVI2	Plasminogen;Plasmin heavy chain A;Activation peptide;Angiostatin;Plasmin heavy chain A, short form;Plasmin light chain B	PLG	sp|P00747|PLMN_HUMAN Plasminogen OS=Homo sapiens GN=PLG PE=1 SV=2	16	26.7	90.568	0	0	2788100	15647000	10273000	57968000	782340	0	1701500	89159940
P02747	Complement C1q subcomponent subunit C	C1QC	sp|P02747|C1QC_HUMAN Complement C1q subcomponent subunit C OS=Homo sapiens GN=C1QC PE=1 SV=3	5	25.3	25.773	0	0	0	0	0	0	0	0	83598000	83598000
P07357	Complement component C8 alpha chain	C8A	sp|P07357|CO8A_HUMAN Complement component C8 alpha chain OS=Homo sapiens GN=C8A PE=1 SV=2	13	31.7	65.163	0	0	0	0	475570	79091000	1223200	0	0	80789770
P02750	Leucine-rich alpha-2-glycoprotein	LRG1	sp|P02750|A2GL_HUMAN Leucine-rich alpha-2-glycoprotein OS=Homo sapiens GN=LRG1 PE=1 SV=2	3	8.9	38.177	0	0	754560	0	0	0	79984000	0	0	80738560
P02743	Serum amyloid P-component;Serum amyloid P-component(1-203)	APCS	sp|P02743|SAMP_HUMAN Serum amyloid P-component OS=Homo sapiens GN=APCS PE=1 SV=2	6	24.7	25.387	0	0	0	0	0	0	0	0	77298000	77298000
P00748	Coagulation factor XII;Coagulation factor XIIa heavy chain;Beta-factor XIIa part 1;Coagulation factor XIIa light chain	F12	sp|P00748|FA12_HUMAN Coagulation factor XII OS=Homo sapiens GN=F12 PE=1 SV=3	9	16.7	67.791	0	0	0	0	74133000	0	0	0	0	74133000
P06727	Apolipoprotein A-IV	APOA4	sp|P06727|APOA4_HUMAN Apolipoprotein A-IV OS=Homo sapiens GN=APOA4 PE=1 SV=3	12	26	45.398	0	0	2772000	0	817270	0	0	69092000	0	72681270
P04196	Histidine-rich glycoprotein	HRG	sp|P04196|HRG_HUMAN Histidine-rich glycoprotein OS=Homo sapiens GN=HRG PE=1 SV=1	12	25.3	59.578	0	0	1470700	2151000	4715000	52962000	11299000	0	0	72597700
P07225;G5E9F8;H7BXT0	Vitamin K-dependent protein S	PROS1	sp|P07225|PROS_HUMAN Vitamin K-dependent protein S OS=Homo sapiens GN=PROS1 PE=1 SV=1;tr|G5E9F8|G5E9F8_HUMAN Protein S (Alpha), isoform CRA_b OS=Homo sapiens GN=PROS1 PE=1 SV=1	7	10.7	75.122	0	0	1619400	1716400	65756000	479170	0	0	0	69570970
C9JMH6;A0A0J9YY65;P08697;A0A0G2JPA8;P08697-2;C9JPV4;A0A0J9YWQ3;CON__P28800	Alpha-2-antiplasmin	SERPINF2	tr|C9JMH6|C9JMH6_HUMAN Alpha-2-antiplasmin (Fragment) OS=Homo sapiens GN=SERPINF2 PE=1 SV=1;tr|A0A0J9YY65|A0A0J9YY65_HUMAN Alpha-2-antiplasmin (Fragment) OS=Homo sapiens GN=SERPINF2 PE=1 SV=1;sp|P08697|A2AP_HUMAN Alpha-2-antiplasmin OS=Homo sapiens GN=SERP	7	29.4	27.823	0	0	2190300	6521800	27085000	1333100	24791000	0	0	61921200
A0A0B4J1U7		IGHV6-1	sp|A0A0B4J1U7|HV601_HUMAN Immunoglobulin heavy variable 6-1 OS=Homo sapiens GN=IGHV6-1 PE=3 SV=1	2	13.2	13.481	0	0	0	0	1673800	0	58229000	0	0	59902800
P06312	Ig kappa chain V-IV region	IGKV4-1	sp|P06312|KV401_HUMAN Immunoglobulin kappa variable 4-1 OS=Homo sapiens GN=IGKV4-1 PE=1 SV=1	3	22.3	13.38	0	0	0	0	0	0	0	0	59808000	59808000
P02763	Alpha-1-acid glycoprotein 1	ORM1	sp|P02763|A1AG1_HUMAN Alpha-1-acid glycoprotein 1 OS=Homo sapiens GN=ORM1 PE=1 SV=1	6	32.8	23.511	0	0	1902300	1186200	2727100	6547900	44226000	2854000	0	59443500
A0A087X232;P09871;F8WCZ6;H0Y5D1;B5MCV4;F5H7T4;C9JMA2;F8W876;P48740-3;P48740-4;P48740;P48740-2	Complement C1s subcomponent;Complement C1s subcomponent heavy chain;Complement C1s subcomponent light chain	C1S	tr|A0A087X232|A0A087X232_HUMAN Complement C1s subcomponent OS=Homo sapiens GN=C1S PE=1 SV=1;sp|P09871|C1S_HUMAN Complement C1s subcomponent OS=Homo sapiens GN=C1S PE=1 SV=1;tr|F8WCZ6|F8WCZ6_HUMAN Complement C1s subcomponent OS=Homo sapiens GN=C1S PE=1 SV=1	10	17	75.905	0	0	695580	1356100	53722000	0	1966600	0	0	57740280
P00734;E9PIT3;C9JV37;CON__P00735	Prothrombin;Activation peptide fragment 1;Activation peptide fragment 2;Thrombin light chain;Thrombin heavy chain	F2	sp|P00734|THRB_HUMAN Prothrombin OS=Homo sapiens GN=F2 PE=1 SV=2;tr|E9PIT3|E9PIT3_HUMAN Prothrombin OS=Homo sapiens GN=F2 PE=1 SV=1;tr|C9JV37|C9JV37_HUMAN Prothrombin (Fragment) OS=Homo sapiens GN=F2 PE=1 SV=1	10	20.9	70.036	0	0	0	1650500	55550000	0	0	0	0	57200500
P81605;P81605-2	Dermcidin;Survival-promoting peptide;DCD-1	DCD	sp|P81605|DCD_HUMAN Dermcidin OS=Homo sapiens GN=DCD PE=1 SV=2;sp|P81605-2|DCD_HUMAN Isoform 2 of Dermcidin OS=Homo sapiens GN=DCD	3	22.7	11.284	0	11783000	22670000	10097000	1838700	0	7776400	0	0	54165100
P55058-4;P55058;P55058-3;P55058-2	Phospholipid transfer protein	PLTP	sp|P55058-4|PLTP_HUMAN Isoform 4 of Phospholipid transfer protein OS=Homo sapiens GN=PLTP;sp|P55058|PLTP_HUMAN Phospholipid transfer protein OS=Homo sapiens GN=PLTP PE=1 SV=1	5	11.6	44.847	0	0	0	0	53683000	0	0	0	0	53683000
P01019	Angiotensinogen;Angiotensin-1;Angiotensin-2;Angiotensin-3;Angiotensin-4;Angiotensin 1-9;Angiotensin 1-7;Angiotensin 1-5;Angiotensin 1-4	AGT	sp|P01019|ANGT_HUMAN Angiotensinogen OS=Homo sapiens GN=AGT PE=1 SV=1	6	16.7	53.154	0	0	0	0	0	19104000	32868000	0	0	51972000
P05546	Heparin cofactor 2	SERPIND1	sp|P05546|HEP2_HUMAN Heparin cofactor 2 OS=Homo sapiens GN=SERPIND1 PE=1 SV=3	8	22.6	57.07	0	0	0	0	0	49016000	2068400	0	497240	51581640
P01782;P0DP04	Ig heavy chain V-III region DOB		sp|P01782|HV309_HUMAN Immunoglobulin heavy variable 3-9 OS=Homo sapiens GN=IGHV3-9 PE=1 SV=2;sp|P0DP04|HV43D_HUMAN Immunoglobulin heavy variable 3-43D OS=Homo sapiens GN=IGHV3-43D PE=3 SV=1	2	16.9	12.945	0	0	0	0	3663100	0	44498000	0	0	48161100
P04004;F5GX75	Vitronectin;Vitronectin V65 subunit;Vitronectin V10 subunit;Somatomedin-B	VTN	sp|P04004|VTNC_HUMAN Vitronectin OS=Homo sapiens GN=VTN PE=1 SV=1	5	16.3	54.305	0	0	0	340820	2580400	41737000	2579200	0	0	47237420
P08185;G3V4V7;G3V350	Corticosteroid-binding globulin	SERPINA6	sp|P08185|CBG_HUMAN Corticosteroid-binding globulin OS=Homo sapiens GN=SERPINA6 PE=1 SV=1	6	17.3	45.14	0	0	0	0	0	7772600	36399000	0	0	44171600
A0A0A0MSL3;G3V2F7;G3V113;H0YBP9;I3L0A0;Q13404-6;Q13404-8;Q15819;Q13404;Q13404-7;Q13404-2;Q13404-1	Ubiquitin-conjugating enzyme E2 variant 1;Ubiquitin-conjugating enzyme E2 variant 2	UBE2V1;UBE2V2;TMEM189-UBE2V1	tr|A0A0A0MSL3|A0A0A0MSL3_HUMAN Ubiquitin-conjugating enzyme E2 variant 1 OS=Homo sapiens GN=UBE2V1 PE=3 SV=1;tr|G3V2F7|G3V2F7_HUMAN Ubiquitin-conjugating enzyme E2 variant 1 OS=Homo sapiens GN=UBE2V1 PE=3 SV=2;tr|G3V113|G3V113_HUMAN Ubiquitin-conjugating e	1	9.7	11.829	0.0072727	0	0	0	0	43668000	0	0	0	43668000
P60709;C9JTX5;C9JZR7;G5E9R0;E7EVS6;C9JUM1;F8WB63;B8ZZJ2;C9JFL5;F6UVQ4;F6QUT6;A6NL76;F8WCH0;Q9BYX7;Q562R1	Actin, cytoplasmic 1;Actin, cytoplasmic 1, N-terminally processed	ACTB;ACTG2;ACTA2;ACTA1	sp|P60709|ACTB_HUMAN Actin, cytoplasmic 1 OS=Homo sapiens GN=ACTB PE=1 SV=1;tr|C9JTX5|C9JTX5_HUMAN Actin, cytoplasmic 1 (Fragment) OS=Homo sapiens GN=ACTB PE=1 SV=1;tr|C9JZR7|C9JZR7_HUMAN Actin, cytoplasmic 1 (Fragment) OS=Homo sapiens GN=ACTB PE=1 SV=8;tr	8	23.2	41.736	0	731400	3777000	3935700	0	0	0	32094000	1300100	41838200
A0A0J9YVU5;A0A0C4DH43;A0A0B4J1V2;P01814	Ig heavy chain V-II region OU	IGHV2-26	tr|A0A0J9YVU5|A0A0J9YVU5_HUMAN Immunoglobulin heavy variable 2-70 (Fragment) OS=Homo sapiens GN=IGHV2-70 PE=4 SV=1;tr|A0A0C4DH43|A0A0C4DH43_HUMAN Uncharacterized protein (Fragment) OS=Homo sapiens PE=1 SV=1;sp|A0A0B4J1V2|HV226_HUMAN Immunoglobulin heavy va	2	13.4	13.358	0	0	0	0	0	0	40695000	0	0	40695000
P10643	Complement component C7	C7	sp|P10643|CO7_HUMAN Complement component C7 OS=Homo sapiens GN=C7 PE=1 SV=2	8	10.8	93.517	0	0	5425900	21107000	8084000	0	5847200	0	0	40464100
A0A087X0I2;G3XAM2;E7ETH0;P05156;D6R9Z8;CON__Q32PI4	Complement factor I;Complement factor I heavy chain;Complement factor I light chain	CFI	tr|A0A087X0I2|A0A087X0I2_HUMAN Complement factor I OS=Homo sapiens GN=CFI PE=1 SV=1;tr|G3XAM2|G3XAM2_HUMAN Complement factor I OS=Homo sapiens GN=CFI PE=1 SV=1;tr|E7ETH0|E7ETH0_HUMAN Complement factor I OS=Homo sapiens GN=CFI PE=1 SV=1;sp|P05156|CFAI_HUMAN	7	19	42.519	0	0	0	763080	1443200	0	34856000	151190	0	37213470
P20742;P20742-2	Pregnancy zone protein	PZP	sp|P20742|PZP_HUMAN Pregnancy zone protein OS=Homo sapiens GN=PZP PE=1 SV=4;sp|P20742-2|PZP_HUMAN Isoform 2 of Pregnancy zone protein OS=Homo sapiens GN=PZP	17	13.4	163.86	0	0	23803000	11150000	0	0	747090	0	0	35700090
Q5T749	Keratinocyte proline-rich protein	KPRP	sp|Q5T749|KPRP_HUMAN Keratinocyte proline-rich protein OS=Homo sapiens GN=KPRP PE=1 SV=1	6	9	64.135	0	3539100	3771700	11392000	0	0	8426100	0	7472700	34601600
P18206-2;P18206;P18206-3	Vinculin	VCL	sp|P18206-2|VINC_HUMAN Isoform 1 of Vinculin OS=Homo sapiens GN=VCL;sp|P18206|VINC_HUMAN Vinculin OS=Homo sapiens GN=VCL PE=1 SV=4	14	15.3	116.72	0	0	0	32049000	0	0	0	0	0	32049000
F5GY80;F5H7G1;P07358	Complement component C8 beta chain	C8B	tr|F5GY80|F5GY80_HUMAN Complement component C8 beta chain OS=Homo sapiens GN=C8B PE=1 SV=1;tr|F5H7G1|F5H7G1_HUMAN Complement component C8 beta chain OS=Homo sapiens GN=C8B PE=1 SV=1;sp|P07358|CO8B_HUMAN Complement component C8 beta chain OS=Homo sapiens GN	9	20.4	60.04	0	0	0	0	0	24955000	6111000	0	0	31066000
P25311;C9JEV0	Zinc-alpha-2-glycoprotein	AZGP1	sp|P25311|ZA2G_HUMAN Zinc-alpha-2-glycoprotein OS=Homo sapiens GN=AZGP1 PE=1 SV=2	3	13.1	34.258	0	2714700	3403000	1839900	724230	0	2523000	14446000	1686400	27337230
A0A0G2JRQ6			tr|A0A0G2JRQ6|A0A0G2JRQ6_HUMAN Uncharacterized protein (Fragment) OS=Homo sapiens PE=1 SV=4	2	13.7	12.748	0	0	0	0	0	0	0	0	25518000	25518000
P02741;Q5VVP7;P02741-2	C-reactive protein;C-reactive protein(1-205)	CRP	sp|P02741|CRP_HUMAN C-reactive protein OS=Homo sapiens GN=CRP PE=1 SV=1;tr|Q5VVP7|Q5VVP7_HUMAN C-reactive protein OS=Homo sapiens GN=CRP PE=1 SV=1;sp|P02741-2|CRP_HUMAN Isoform 2 of C-reactive protein OS=Homo sapiens GN=CRP	2	8.9	25.038	0	0	0	0	0	0	472490	0	24241000	24713490
P01859	Ig gamma-2 chain C region	IGHG2	sp|P01859|IGHG2_HUMAN Immunoglobulin heavy constant gamma 2 OS=Homo sapiens GN=IGHG2 PE=1 SV=2	12	44.5	35.9	0	0	0	0	0	8901600	14717000	0	0	23618600
P29622	Kallistatin	SERPINA4	sp|P29622|KAIN_HUMAN Kallistatin OS=Homo sapiens GN=SERPINA4 PE=1 SV=3	7	17.3	48.541	0	0	0	0	0	0	22771000	0	0	22771000
P15924;P15924-3;P15924-2	Desmoplakin	DSP	sp|P15924|DESP_HUMAN Desmoplakin OS=Homo sapiens GN=DSP PE=1 SV=3;sp|P15924-3|DESP_HUMAN Isoform DSPIa of Desmoplakin OS=Homo sapiens GN=DSP;sp|P15924-2|DESP_HUMAN Isoform DPII of Desmoplakin OS=Homo sapiens GN=DSP	17	5.7	331.77	0	0	3091900	16352000	0	0	868120	0	2073900	22385920
B8ZZF7;B4DLP0;O00338;O00338-2	Sulfotransferase;Sulfotransferase 1C2	SULT1C2	tr|B8ZZF7|B8ZZF7_HUMAN Sulfotransferase OS=Homo sapiens GN=SULT1C2 PE=1 SV=1;tr|B4DLP0|B4DLP0_HUMAN Sulfotransferase OS=Homo sapiens GN=SULT1C2 PE=1 SV=1;sp|O00338|ST1C2_HUMAN Sulfotransferase 1C2 OS=Homo sapiens GN=SULT1C2 PE=1 SV=1;sp|O00338-2|ST1C2_HUMA	1	4.6	30.653	0	0	21620000	0	0	0	0	0	0	21620000
Q08380;K7EP36;K7ESM3;K7EKQ5;K7EQT9;K7ES75;K7EN99;K7ERZ6;K7EJY8;K7EJD3	Galectin-3-binding protein	LGALS3BP	sp|Q08380|LG3BP_HUMAN Galectin-3-binding protein OS=Homo sapiens GN=LGALS3BP PE=1 SV=1	9	15.6	65.33	0	0	0	8734800	8931700	2267100	0	0	0	19933600
P04279;P04279-2	Semenogelin-1;Alpha-inhibin-92;Alpha-inhibin-31;Seminal basic protein	SEMG1	sp|P04279|SEMG1_HUMAN Semenogelin-1 OS=Homo sapiens GN=SEMG1 PE=1 SV=2;sp|P04279-2|SEMG1_HUMAN Isoform 2 of Semenogelin-1 OS=Homo sapiens GN=SEMG1	7	20.1	52.13	0	19300000	0	0	215630	0	246750	0	0	19762380
F5GZZ9;C9JHR8;Q86VB7-3;Q86VB7-4;Q86VB7;Q86VB7-2	Scavenger receptor cysteine-rich type 1 protein M130;Soluble CD163	CD163	tr|F5GZZ9|F5GZZ9_HUMAN Scavenger receptor cysteine-rich type 1 protein M130 OS=Homo sapiens GN=CD163 PE=1 SV=1;tr|C9JHR8|C9JHR8_HUMAN Scavenger receptor cysteine-rich type 1 protein M130 OS=Homo sapiens GN=CD163 PE=1 SV=1;sp|Q86VB7-3|C163A_HUMAN Isoform 3	7	7.3	120.32	0	0	8777500	9960900	0	0	0	0	0	18738400
P15169;CON__Q2KJ83	Carboxypeptidase N catalytic chain	CPN1	sp|P15169|CBPN_HUMAN Carboxypeptidase N catalytic chain OS=Homo sapiens GN=CPN1 PE=1 SV=1	4	9.2	52.286	0	0	0	0	0	0	18575000	0	0	18575000
B4DPQ0;P00736;F5H2D0;F5H1V0;F5H6Y3;H0YFL7	Complement C1r subcomponent;Complement C1r subcomponent heavy chain;Complement C1r subcomponent light chain	C1R	tr|B4DPQ0|B4DPQ0_HUMAN Complement C1r subcomponent OS=Homo sapiens GN=C1R PE=1 SV=1;sp|P00736|C1R_HUMAN Complement C1r subcomponent OS=Homo sapiens GN=C1R PE=1 SV=2;tr|F5H2D0|F5H2D0_HUMAN Complement C1r subcomponent OS=Homo sapiens GN=C1R PE=1 SV=3	5	7.6	81.889	0	0	6578800	8175500	1847200	0	1878000	0	0	18479500
Q96NT1	Nucleosome assembly protein 1-like 5	NAP1L5	sp|Q96NT1|NP1L5_HUMAN Nucleosome assembly protein 1-like 5 OS=Homo sapiens GN=NAP1L5 PE=1 SV=1	1	5.5	19.593	0.0075188	0	0	0	0	18454000	0	0	0	18454000
P98160;A0A0U1RQT3	Basement membrane-specific heparan sulfate proteoglycan core protein;Endorepellin;LG3 peptide	HSPG2	sp|P98160|PGBM_HUMAN Basement membrane-specific heparan sulfate proteoglycan core protein OS=Homo sapiens GN=HSPG2 PE=1 SV=4	14	3.3	468.83	0	1119600	12126000	4696000	0	0	0	0	0	17941600
O75882-2;O75882;O75882-3	Attractin	ATRN	sp|O75882-2|ATRN_HUMAN Isoform 2 of Attractin OS=Homo sapiens GN=ATRN;sp|O75882|ATRN_HUMAN Attractin OS=Homo sapiens GN=ATRN PE=1 SV=2;sp|O75882-3|ATRN_HUMAN Isoform 3 of Attractin OS=Homo sapiens GN=ATRN	9	7.9	141.43	0	0	16792000	985250	0	0	0	0	0	17777250
Q15063-5;Q15063;B1ALD9;Q15063-6;Q15063-2;Q15063-3;Q15063-7;Q15063-4;CON__Q2KJC7	Periostin	POSTN	sp|Q15063-5|POSTN_HUMAN Isoform 5 of Periostin OS=Homo sapiens GN=POSTN;sp|Q15063|POSTN_HUMAN Periostin OS=Homo sapiens GN=POSTN PE=1 SV=2;tr|B1ALD9|B1ALD9_HUMAN Periostin OS=Homo sapiens GN=POSTN PE=1 SV=1;sp|Q15063-6|POSTN_HUMAN Isoform 6 of Periostin OS	7	8.7	90.423	0	0	0	0	16709000	0	0	0	0	16709000
Q96PD5;Q96PD5-2;CON__ENSEMBL:ENSBTAP00000016285	N-acetylmuramoyl-L-alanine amidase	PGLYRP2	sp|Q96PD5|PGRP2_HUMAN N-acetylmuramoyl-L-alanine amidase OS=Homo sapiens GN=PGLYRP2 PE=1 SV=1;sp|Q96PD5-2|PGRP2_HUMAN Isoform 2 of N-acetylmuramoyl-L-alanine amidase OS=Homo sapiens GN=PGLYRP2	8	22.4	62.216	0	0	0	0	0	16539000	0	0	0	16539000
A0A0C4DH35		IGHV3-35	tr|A0A0C4DH35|A0A0C4DH35_HUMAN Immunoglobulin heavy variable 3-35 (non-functional) (Fragment) OS=Homo sapiens GN=IGHV3-35 PE=1 SV=1	1	9.4	12.81	0	0	0	0	1067300	0	15372000	0	0	16439300
A0A0B4J2B5;S4R460;A0A0J9YX35		IGHV3OR16-9	tr|A0A0B4J2B5|A0A0B4J2B5_HUMAN Immunoglobulin heavy variable 3/OR16-9 (non-functional) (Fragment) OS=Homo sapiens GN=IGHV3OR16-9 PE=1 SV=1;tr|S4R460|S4R460_HUMAN Immunoglobulin heavy variable 3/OR16-9 (non-functional) OS=Homo sapiens GN=IGHV3OR16-9 PE=1 SV	3	39.8	10.657	0	0	639350	1225100	3460200	4474500	6068900	0	188450	16056500
F5GXL6		DDX11	tr|F5GXL6|F5GXL6_HUMAN ATP-dependent DNA helicase DDX11 (Fragment) OS=Homo sapiens GN=DDX11 PE=4 SV=8	1	6.3	21.412	0	0	0	0	15566000	0	0	0	0	15566000
P05160;CON__Q2TBQ1	Coagulation factor XIII B chain	F13B	sp|P05160|F13B_HUMAN Coagulation factor XIII B chain OS=Homo sapiens GN=F13B PE=1 SV=3	4	7	75.51	0	0	0	0	15026000	0	0	0	0	15026000
P02452;CON__Q862S4	Collagen alpha-1(I) chain	COL1A1	sp|P02452|CO1A1_HUMAN Collagen alpha-1(I) chain OS=Homo sapiens GN=COL1A1 PE=1 SV=5	5	4.6	138.94	0	0	6953100	6821400	0	1050000	0	0	0	14824500
P27797;K7EJB9;K7EL50	Calreticulin	CALR	sp|P27797|CALR_HUMAN Calreticulin OS=Homo sapiens GN=CALR PE=1 SV=1;tr|K7EJB9|K7EJB9_HUMAN Calreticulin (Fragment) OS=Homo sapiens GN=CALR PE=1 SV=1	5	13.7	48.141	0	0	0	0	0	0	14429000	0	0	14429000
H0YMM1;H0YKS4;H0YMD0;H0YMU9;H0YN42;P07355;P07355-2;H0YKZ7;H0YLV6;H0YMT9;H0YKX9;H0YMW4;H0YM50;A6NMY6;H0YKV8;H0YKL9;H0YNP5;H0YLE2;H0YNB8;H0YN52;H0YMD9;H0YKN4;H0YNA0;H0YN28;H0YL33	Annexin;Annexin A2;Putative annexin A2-like protein	ANXA2;ANXA2P2	tr|H0YMM1|H0YMM1_HUMAN Annexin (Fragment) OS=Homo sapiens GN=ANXA2 PE=1 SV=1;tr|H0YKS4|H0YKS4_HUMAN Annexin (Fragment) OS=Homo sapiens GN=ANXA2 PE=1 SV=1;tr|H0YMD0|H0YMD0_HUMAN Annexin (Fragment) OS=Homo sapiens GN=ANXA2 PE=1 SV=1;tr|H0YMU9|H0YMU9_HUMAN An	4	26.8	16.458	0	1364600	977680	5047700	0	0	2845600	0	4171300	14406880
A0A087WTA8;P08123	Collagen alpha-2(I) chain	COL1A2	tr|A0A087WTA8|A0A087WTA8_HUMAN Collagen alpha-2(I) chain OS=Homo sapiens GN=COL1A2 PE=1 SV=1;sp|P08123|CO1A2_HUMAN Collagen alpha-2(I) chain OS=Homo sapiens GN=COL1A2 PE=1 SV=7	6	4.8	129.15	0	0	0	14161000	0	0	0	0	0	14161000
P05543;CON__Q9TT36	Thyroxine-binding globulin	SERPINA7	sp|P05543|THBG_HUMAN Thyroxine-binding globulin OS=Homo sapiens GN=SERPINA7 PE=1 SV=2	4	9.6	46.324	0	0	0	0	0	0	13634000	0	0	13634000
P14923;C9JTX4;C9J826;C9JK18;C9JKY1	Junction plakoglobin	JUP	sp|P14923|PLAK_HUMAN Junction plakoglobin OS=Homo sapiens GN=JUP PE=1 SV=3;tr|C9JTX4|C9JTX4_HUMAN Junction plakoglobin (Fragment) OS=Homo sapiens GN=JUP PE=1 SV=1;tr|C9J826|C9J826_HUMAN Junction plakoglobin (Fragment) OS=Homo sapiens GN=JUP PE=1 SV=8;tr|C9	4	6.4	81.744	0	0	1522700	11659000	0	0	0	0	0	13181700
P01766	Ig heavy chain V-III region BRO		sp|P01766|HV313_HUMAN Immunoglobulin heavy variable 3-13 OS=Homo sapiens GN=IGHV3-13 PE=1 SV=2	1	9.5	12.506	0	0	0	0	601680	0	11998000	0	0	12599680
Q15582;H0Y8L3;H0Y9D7;S4R3C6;H0YAB8;H0Y8M8	Transforming growth factor-beta-induced protein ig-h3	TGFBI	sp|Q15582|BGH3_HUMAN Transforming growth factor-beta-induced protein ig-h3 OS=Homo sapiens GN=TGFBI PE=1 SV=1;tr|H0Y8L3|H0Y8L3_HUMAN Transforming growth factor-beta-induced protein ig-h3 (Fragment) OS=Homo sapiens GN=TGFBI PE=1 SV=1	7	12.9	74.68	0	0	0	0	0	11885000	0	0	0	11885000
A0A0B4J1V0		IGHV3-15	sp|A0A0B4J1V0|HV315_HUMAN Immunoglobulin heavy variable 3-15 OS=Homo sapiens GN=IGHV3-15 PE=3 SV=1	3	29.4	12.926	0	0	0	0	0	0	11872000	0	0	11872000
B1AHL2;P23142-4	Fibulin-1	FBLN1	tr|B1AHL2|B1AHL2_HUMAN Fibulin-1 OS=Homo sapiens GN=FBLN1 PE=1 SV=1;sp|P23142-4|FBLN1_HUMAN Isoform C of Fibulin-1 OS=Homo sapiens GN=FBLN1	6	10.3	78.329	0	0	0	0	11313000	0	0	0	0	11313000
P35858;P35858-2	Insulin-like growth factor-binding protein complex acid labile subunit	IGFALS	sp|P35858|ALS_HUMAN Insulin-like growth factor-binding protein complex acid labile subunit OS=Homo sapiens GN=IGFALS PE=1 SV=1;sp|P35858-2|ALS_HUMAN Isoform 2 of Insulin-like growth factor-binding protein complex acid labile subunit OS=Homo sapiens GN=IGFA	3	5.1	66.034	0	0	0	0	10836000	0	0	0	0	10836000
B1AKG0;Q03591;V9GYE7;P36980-2;P36980;Q9BXR6	Complement factor H-related protein 1	CFHR1	tr|B1AKG0|B1AKG0_HUMAN Complement factor H-related protein 1 OS=Homo sapiens GN=CFHR1 PE=1 SV=1;sp|Q03591|FHR1_HUMAN Complement factor H-related protein 1 OS=Homo sapiens GN=CFHR1 PE=1 SV=2	6	21	30.858	0	0	0	0	635050	0	0	9932100	0	10567150
H0YKD9;Q15650	Activating signal cointegrator 1	TRIP4	tr|H0YKD9|H0YKD9_HUMAN Activating signal cointegrator 1 (Fragment) OS=Homo sapiens GN=TRIP4 PE=1 SV=1;sp|Q15650|TRIP4_HUMAN Activating signal cointegrator 1 OS=Homo sapiens GN=TRIP4 PE=1 SV=4	1	7.2	12.591	0	0	0	0	10359000	0	0	0	0	10359000
P62805	Histone H4	HIST1H4A	sp|P62805|H4_HUMAN Histone H4 OS=Homo sapiens GN=HIST1H4A PE=1 SV=2	4	38.8	11.367	0	978590	1040400	7815700	0	0	0	0	0	9834690
A0A087WXI2;Q9Y6R7;A0A087WUZ2	IgGFc-binding protein	FCGBP	tr|A0A087WXI2|A0A087WXI2_HUMAN IgGFc-binding protein OS=Homo sapiens GN=FCGBP PE=1 SV=1;sp|Q9Y6R7|FCGBP_HUMAN IgGFc-binding protein OS=Homo sapiens GN=FCGBP PE=1 SV=3;tr|A0A087WUZ2|A0A087WUZ2_HUMAN IgGFc-binding protein OS=Homo sapiens GN=FCGBP PE=1 SV=1	6	2.5	445.21	0	0	0	6884400	0	764910	1719200	0	0	9368510
J3KPS3;P04075;P04075-2;H3BQN4;H3BMQ8;H3BUH7;H3BR04;H3BPS8;H3BR68;H3BU78	Fructose-bisphosphate aldolase;Fructose-bisphosphate aldolase A	ALDOA	tr|J3KPS3|J3KPS3_HUMAN Fructose-bisphosphate aldolase OS=Homo sapiens GN=ALDOA PE=1 SV=1;sp|P04075|ALDOA_HUMAN Fructose-bisphosphate aldolase A OS=Homo sapiens GN=ALDOA PE=1 SV=2;sp|P04075-2|ALDOA_HUMAN Isoform 2 of Fructose-bisphosphate aldolase A OS=Homo	6	13.9	39.817	0	0	8020600	0	0	0	0	1312900	0	9333500
P03951;P03951-2;X6R3B1;D6RB32;H0Y596	Coagulation factor XI;Coagulation factor XIa heavy chain;Coagulation factor XIa light chain	F11	sp|P03951|FA11_HUMAN Coagulation factor XI OS=Homo sapiens GN=F11 PE=1 SV=1;sp|P03951-2|FA11_HUMAN Isoform 2 of Coagulation factor XI OS=Homo sapiens GN=F11	5	8	70.108	0	0	0	0	8979600	0	0	0	0	8979600
F8VV32;A0A0B4J259;P61626	Lysozyme;Lysozyme C	LYZ	tr|F8VV32|F8VV32_HUMAN Lysozyme C OS=Homo sapiens GN=LYZ PE=1 SV=1;tr|A0A0B4J259|A0A0B4J259_HUMAN Lysozyme C OS=Homo sapiens GN=LYZ PE=1 SV=1;sp|P61626|LYSC_HUMAN Lysozyme C OS=Homo sapiens GN=LYZ PE=1 SV=1	2	20.2	11.488	0	6883000	1410300	539950	0	0	0	0	0	8833250
Q08554-2;Q08554	Desmocollin-1	DSC1	sp|Q08554-2|DSC1_HUMAN Isoform 1B of Desmocollin-1 OS=Homo sapiens GN=DSC1;sp|Q08554|DSC1_HUMAN Desmocollin-1 OS=Homo sapiens GN=DSC1 PE=1 SV=2	4	5.7	93.834	0	480600	1633000	1389100	0	0	3956800	0	1332800	8792300
A0A0G2JMB2;P01877	Ig alpha-2 chain C region	IGHA2	tr|A0A0G2JMB2|A0A0G2JMB2_HUMAN Immunoglobulin heavy constant alpha 2 (Fragment) OS=Homo sapiens GN=IGHA2 PE=1 SV=1;sp|P01877|IGHA2_HUMAN Immunoglobulin heavy constant alpha 2 OS=Homo sapiens GN=IGHA2 PE=1 SV=4	9	32.6	36.508	0	0	0	1323500	0	5786000	997740	0	0	8107240
O43866	CD5 antigen-like	CD5L	sp|O43866|CD5L_HUMAN CD5 antigen-like OS=Homo sapiens GN=CD5L PE=1 SV=1	3	11.2	38.087	0	0	0	0	0	0	0	8096500	0	8096500
A0A0C4DH68;A0A075B6R9		IGKV2-24;IGKV2D-24	sp|A0A0C4DH68|KV224_HUMAN Immunoglobulin kappa variable 2-24 OS=Homo sapiens GN=IGKV2-24 PE=3 SV=1;tr|A0A075B6R9|A0A075B6R9_HUMAN Immunoglobulin kappa variable 2D-24 (non-functional) (Fragment) OS=Homo sapiens GN=IGKV2D-24 PE=4 SV=1	1	10.8	13.079	0	0	0	0	0	0	0	0	7955900	7955900
O00391-2;O00391	Sulfhydryl oxidase 1	QSOX1	sp|O00391-2|QSOX1_HUMAN Isoform 2 of Sulfhydryl oxidase 1 OS=Homo sapiens GN=QSOX1;sp|O00391|QSOX1_HUMAN Sulfhydryl oxidase 1 OS=Homo sapiens GN=QSOX1 PE=1 SV=3	4	7.1	66.86	0	0	0	0	7789100	0	0	0	0	7789100
A0A0B4J1V6;A0A0A0MS15		IGHV3-73;IGHV3-49	sp|A0A0B4J1V6|HV373_HUMAN Immunoglobulin heavy variable 3-73 OS=Homo sapiens GN=IGHV3-73 PE=3 SV=1;sp|A0A0A0MS15|HV349_HUMAN Immunoglobulin heavy variable 3-49 OS=Homo sapiens GN=IGHV3-49 PE=3 SV=1	2	15.1	12.858	0	0	0	0	343500	0	7329900	0	0	7673400
P0C0L4-2;P0C0L4	Complement C4-A;Complement C4 beta chain;Complement C4-A alpha chain;C4a anaphylatoxin;C4b-A;C4d-A;Complement C4 gamma chain	C4A	sp|P0C0L4-2|CO4A_HUMAN Isoform 2 of Complement C4-A OS=Homo sapiens GN=C4A;sp|P0C0L4|CO4A_HUMAN Complement C4-A OS=Homo sapiens GN=C4A PE=1 SV=2	49	30.9	187.7	0	0	3650700	3067300	0	0	0	0	0	6718000
Q6UWP8	Suprabasin	SBSN	sp|Q6UWP8|SBSN_HUMAN Suprabasin OS=Homo sapiens GN=SBSN PE=1 SV=2	3	18.3	60.54	0	0	666130	3107800	0	0	1925300	0	862740	6561970
P22792	Carboxypeptidase N subunit 2	CPN2	sp|P22792|CPN2_HUMAN Carboxypeptidase N subunit 2 OS=Homo sapiens GN=CPN2 PE=1 SV=3	2	2.9	60.556	0	0	0	0	6354600	0	0	0	0	6354600
P06681;A0A0G2JL69;P06681-3;E9PDZ0;B4DQI1;A0A0G2JK28;H0Y868	Complement C2;Complement C2b fragment;Complement C2a fragment	C2	sp|P06681|CO2_HUMAN Complement C2 OS=Homo sapiens GN=C2 PE=1 SV=2;tr|A0A0G2JL69|A0A0G2JL69_HUMAN Complement C2 OS=Homo sapiens GN=C2 PE=1 SV=1;sp|P06681-3|CO2_HUMAN Isoform 3 of Complement C2 OS=Homo sapiens GN=C2;tr|E9PDZ0|E9PDZ0_HUMAN Complement C2 (Frag	9	12.1	83.267	0	0	0	5807900	0	0	0	0	0	5807900
P31944	Caspase-14;Caspase-14 subunit p17, mature form;Caspase-14 subunit p10, mature form;Caspase-14 subunit p20, intermediate form;Caspase-14 subunit p8, intermediate form	CASP14	sp|P31944|CASPE_HUMAN Caspase-14 OS=Homo sapiens GN=CASP14 PE=1 SV=2	3	14	27.679	0	0	0	244660	0	0	5551200	0	0	5795860
P68871;F8W6P5;P02042	Hemoglobin subunit beta;LVV-hemorphin-7;Spinorphin	HBB	sp|P68871|HBB_HUMAN Hemoglobin subunit beta OS=Homo sapiens GN=HBB PE=1 SV=2	3	25.2	15.998	0	0	2958300	0	788830	742750	0	0	1120100	5609980
Q02413;Q02413-2	Desmoglein-1	DSG1	sp|Q02413|DSG1_HUMAN Desmoglein-1 OS=Homo sapiens GN=DSG1 PE=1 SV=2	5	7.2	113.75	0	1895200	483260	463590	0	0	995220	0	1697300	5534570
Q8WXQ3	Putative uncharacterized protein C14orf183	C14orf183	sp|Q8WXQ3|CN183_HUMAN Putative uncharacterized protein encoded by LINC01599 OS=Homo sapiens GN=LINC01599 PE=2 SV=1	1	4.9	35.482	0.0038168	0	0	0	0	5321100	0	0	0	5321100
P08571;D6RFL4	Monocyte differentiation antigen CD14;Monocyte differentiation antigen CD14, urinary form;Monocyte differentiation antigen CD14, membrane-bound form	CD14	sp|P08571|CD14_HUMAN Monocyte differentiation antigen CD14 OS=Homo sapiens GN=CD14 PE=1 SV=2;tr|D6RFL4|D6RFL4_HUMAN Monocyte differentiation antigen CD14 (Fragment) OS=Homo sapiens GN=CD14 PE=1 SV=1	3	5.1	40.076	0	0	0	0	0	0	5287800	0	0	5287800
Q5T750	Skin-specific protein 32	XP32	sp|Q5T750|XP32_HUMAN Skin-specific protein 32 OS=Homo sapiens GN=XP32 PE=1 SV=1	2	7.6	26.238	0	0	0	2584000	0	0	0	0	2286300	4870300
P60174-1;P60174;P60174-4;U3KPZ0;U3KQF3	Triosephosphate isomerase	TPI1	sp|P60174-1|TPIS_HUMAN Isoform 2 of Triosephosphate isomerase OS=Homo sapiens GN=TPI1;sp|P60174|TPIS_HUMAN Triosephosphate isomerase OS=Homo sapiens GN=TPI1 PE=1 SV=3;sp|P60174-4|TPIS_HUMAN Isoform 4 of Triosephosphate isomerase OS=Homo sapiens GN=TPI1	5	22.1	26.669	0	0	355230	508100	0	0	0	0	3860500	4723830
Q9UGM5;F8WAW1;F8WEP7;E9PG08;Q9UGM5-2	Fetuin-B	FETUB	sp|Q9UGM5|FETUB_HUMAN Fetuin-B OS=Homo sapiens GN=FETUB PE=1 SV=2;tr|F8WAW1|F8WAW1_HUMAN Fetuin-B OS=Homo sapiens GN=FETUB PE=1 SV=1;tr|F8WEP7|F8WEP7_HUMAN Fetuin-B OS=Homo sapiens GN=FETUB PE=1 SV=1;tr|E9PG08|E9PG08_HUMAN Fetuin-B OS=Homo sapiens GN=FETUB	2	5	42.054	0	0	0	0	0	0	4582600	0	0	4582600
D6RGG3;Q99715-4;Q99715	Collagen alpha-1(XII) chain	COL12A1	tr|D6RGG3|D6RGG3_HUMAN Collagen alpha-1(XII) chain OS=Homo sapiens GN=COL12A1 PE=1 SV=1;sp|Q99715-4|COCA1_HUMAN Isoform 4 of Collagen alpha-1(XII) chain OS=Homo sapiens GN=COL12A1;sp|Q99715|COCA1_HUMAN Collagen alpha-1(XII) chain OS=Homo sapiens GN=COL12A1	6	2.2	333.2	0	0	4531700	0	0	0	0	0	0	4531700
Q5T4F6;A0A0C4DFP6;Q9NQ79-3;Q9NQ79-2;Q9NQ79	Cartilage acidic protein 1	CRTAC1	tr|Q5T4F6|Q5T4F6_HUMAN Cartilage acidic protein 1 (Fragment) OS=Homo sapiens GN=CRTAC1 PE=1 SV=1;tr|A0A0C4DFP6|A0A0C4DFP6_HUMAN Cartilage acidic protein 1 OS=Homo sapiens GN=CRTAC1 PE=1 SV=1;sp|Q9NQ79-3|CRAC1_HUMAN Isoform 3 of Cartilage acidic protein 1 O	2	3.4	56.575	0	0	0	0	4486800	0	0	0	0	4486800
Q01469;I6L8B7	Fatty acid-binding protein, epidermal	FABP5	sp|Q01469|FABP5_HUMAN Fatty acid-binding protein, epidermal OS=Homo sapiens GN=FABP5 PE=1 SV=3;tr|I6L8B7|I6L8B7_HUMAN Fatty acid-binding protein, epidermal OS=Homo sapiens GN=FABP5 PE=1 SV=1	2	13.3	15.164	0	0	2842500	1610400	0	0	0	0	0	4452900
Q02383	Semenogelin-2	SEMG2	sp|Q02383|SEMG2_HUMAN Semenogelin-2 OS=Homo sapiens GN=SEMG2 PE=1 SV=1	3	11	65.444	0	4325100	0	0	0	0	0	0	0	4325100
Q08188	Protein-glutamine gamma-glutamyltransferase E;Protein-glutamine gamma-glutamyltransferase E 50 kDa catalytic chain;Protein-glutamine gamma-glutamyltransferase E 27 kDa non-catalytic chain	TGM3	sp|Q08188|TGM3_HUMAN Protein-glutamine gamma-glutamyltransferase E OS=Homo sapiens GN=TGM3 PE=1 SV=4	3	4.6	76.631	0	474940	1018100	0	0	0	1301200	0	1435400	4229640
A0A087X1N7;P20929-4;P20929;P20929-3;P20929-2	Nebulin	NEB	tr|A0A087X1N7|A0A087X1N7_HUMAN Nebulin OS=Homo sapiens GN=NEB PE=1 SV=1;sp|P20929-4|NEBU_HUMAN Isoform 4 of Nebulin OS=Homo sapiens GN=NEB;sp|P20929|NEBU_HUMAN Nebulin OS=Homo sapiens GN=NEB PE=1 SV=5;sp|P20929-3|NEBU_HUMAN Isoform 3 of Nebulin OS=Homo sap	1	0.1	990.84	0.0074627	0	4159100	0	0	0	0	0	0	4159100
C9JVG0		TF	tr|C9JVG0|C9JVG0_HUMAN Serotransferrin (Fragment) OS=Homo sapiens GN=TF PE=1 SV=1	5	36.6	14.691	0	0	0	0	4046300	0	0	0	0	4046300
P07900;P07900-2;G3V2J8;Q14568;Q58FF8;Q58FF6	Heat shock protein HSP 90-alpha;Heat shock protein HSP 90-alpha A2	HSP90AA1;HSP90AA2P	sp|P07900|HS90A_HUMAN Heat shock protein HSP 90-alpha OS=Homo sapiens GN=HSP90AA1 PE=1 SV=5;sp|P07900-2|HS90A_HUMAN Isoform 2 of Heat shock protein HSP 90-alpha OS=Homo sapiens GN=HSP90AA1;tr|G3V2J8|G3V2J8_HUMAN Heat shock protein HSP 90-alpha (Fragment) O	4	5.7	84.659	0	0	0	0	3966100	0	0	0	0	3966100
A2A300;A2A2Z9;R4GN29;Q8IVF6	Ankyrin repeat domain-containing protein 18B;Ankyrin repeat domain-containing protein 18A	ANKRD18B;ANKRD18A	tr|A2A300|A2A300_HUMAN Ankyrin repeat domain-containing protein 18B (Fragment) OS=Homo sapiens GN=ANKRD18B PE=1 SV=1;sp|A2A2Z9|AN18B_HUMAN Ankyrin repeat domain-containing protein 18B OS=Homo sapiens GN=ANKRD18B PE=1 SV=1;tr|R4GN29|R4GN29_HUMAN Ankyrin rep	2	5.2	46.866	0	0	0	0	788050	3112500	0	0	0	3900550
Q14520-2;Q14520	Hyaluronan-binding protein 2;Hyaluronan-binding protein 2 50 kDa heavy chain;Hyaluronan-binding protein 2 50 kDa heavy chain alternate form;Hyaluronan-binding protein 2 27 kDa light chain;Hyaluronan-binding protein 2 27 kDa light chain alternate form	HABP2	sp|Q14520-2|HABP2_HUMAN Isoform 2 of Hyaluronan-binding protein 2 OS=Homo sapiens GN=HABP2;sp|Q14520|HABP2_HUMAN Hyaluronan-binding protein 2 OS=Homo sapiens GN=HABP2 PE=1 SV=1	3	6.2	59.864	0	0	0	0	3830600	0	0	0	0	3830600
A0A0C4DH67;A0A0C4DH69;A0A075B6S5		IGKV1-8;IGKV1-9;IGKV1-27	sp|A0A0C4DH67|KV108_HUMAN Immunoglobulin kappa variable 1-8 OS=Homo sapiens GN=IGKV1-8 PE=3 SV=1;sp|A0A0C4DH69|KV109_HUMAN Immunoglobulin kappa variable 1-9 OS=Homo sapiens GN=IGKV1-9 PE=3 SV=1;sp|A0A075B6S5|KV127_HUMAN Immunoglobulin kappa variable 1-27 O	2	27	12.537	0	0	0	0	0	0	0	0	3812300	3812300
P0DP02;A0A0J9YVT0;P01772;A0A0C4DH42;P01767	Ig heavy chain V-III region KOL;Ig heavy chain V-III region BUT	IGHV3-66	sp|P0DP02|HVC33_HUMAN Immunoglobulin heavy variable 3-30-3 OS=Homo sapiens GN=IGHV3-30-3 PE=3 SV=1;tr|A0A0J9YVT0|A0A0J9YVT0_HUMAN Immunoglobulin heavy variable 3-33 (Fragment) OS=Homo sapiens GN=IGHV3-33 PE=4 SV=1;sp|P01772|HV333_HUMAN Immunoglobulin heavy	3	28.2	12.989	0	0	0	0	0	529500	3200200	0	0	3729700
C9J0E4;P01040	Cystatin-A;Cystatin-A, N-terminally processed	CSTA	tr|C9J0E4|C9J0E4_HUMAN Cystatin-A OS=Homo sapiens GN=CSTA PE=1 SV=1;sp|P01040|CYTA_HUMAN Cystatin-A OS=Homo sapiens GN=CSTA PE=1 SV=1	2	38.1	7.0861	0	0	2321500	641570	0	0	566080	0	0	3529150
V9GYE3;V9GYG9;V9GYM3;P02652	Apolipoprotein A-II;Proapolipoprotein A-II;Truncated apolipoprotein A-II	APOA2	tr|V9GYE3|V9GYE3_HUMAN Apolipoprotein A-II OS=Homo sapiens GN=APOA2 PE=1 SV=1;tr|V9GYG9|V9GYG9_HUMAN Apolipoprotein A-II (Fragment) OS=Homo sapiens GN=APOA2 PE=1 SV=1;tr|V9GYM3|V9GYM3_HUMAN Apolipoprotein A-II OS=Homo sapiens GN=APOA2 PE=1 SV=1;sp|P02652|A	1	19.2	5.8767	0.0038462	0	1074800	2409800	0	0	0	0	0	3484600
A0A075B7D0		IGHV1OR15-1	tr|A0A075B7D0|A0A075B7D0_HUMAN Immunoglobulin heavy variable 1/OR15-1 (non-functional) (Fragment) OS=Homo sapiens GN=IGHV1OR15-1 PE=1 SV=1	1	9.4	13.012	0	0	0	0	0	0	3466400	0	0	3466400
E5RFN6;Q8WWZ4-2;Q8WWZ4	ATP-binding cassette sub-family A member 10	ABCA10	tr|E5RFN6|E5RFN6_HUMAN ATP-binding cassette sub-family A member 10 OS=Homo sapiens GN=ABCA10 PE=1 SV=1;sp|Q8WWZ4-2|ABCAA_HUMAN Isoform 2 of ATP-binding cassette sub-family A member 10 OS=Homo sapiens GN=ABCA10;sp|Q8WWZ4|ABCAA_HUMAN ATP-binding cassette sub	1	0.7	150.86	0	0	0	3254400	0	0	0	0	0	3254400
P01599	Ig kappa chain V-I region Gal		sp|P01599|KV117_HUMAN Immunoglobulin kappa variable 1-17 OS=Homo sapiens GN=IGKV1-17 PE=1 SV=2	2	13.7	12.778	0	0	0	0	0	0	0	0	3192300	3192300
P04275	von Willebrand factor;von Willebrand antigen 2	VWF	sp|P04275|VWF_HUMAN von Willebrand factor OS=Homo sapiens GN=VWF PE=1 SV=4	3	1.4	309.26	0	0	3188600	0	0	0	0	0	0	3188600
A0A0C4DH73;A0A0C4DH72;P04432;P01611;P01597	Ig kappa chain V-I region Daudi;Ig kappa chain V-I region Wes;Ig kappa chain V-I region DEE	IGKV1-12;IGKV1-6	sp|A0A0C4DH73|KV112_HUMAN Immunoglobulin kappa variable 1-12 OS=Homo sapiens GN=IGKV1-12 PE=3 SV=1;sp|A0A0C4DH72|KV106_HUMAN Immunoglobulin kappa variable 1-6 OS=Homo sapiens GN=IGKV1-6 PE=3 SV=1;sp|P04432|KVD39_HUMAN Immunoglobulin kappa variable 1D-39 OS	1	13.7	12.645	0	0	0	0	0	0	0	0	3096000	3096000
Q6PI48	Aspartate--tRNA ligase, mitochondrial	DARS2	sp|Q6PI48|SYDM_HUMAN Aspartate--tRNA ligase, mitochondrial OS=Homo sapiens GN=DARS2 PE=1 SV=1	1	1.2	73.562	0.007326	0	0	0	0	0	0	0	2889400	2889400
Q6ZVX7	F-box only protein 50	NCCRP1	sp|Q6ZVX7|FBX50_HUMAN F-box only protein 50 OS=Homo sapiens GN=NCCRP1 PE=1 SV=1	1	4	30.847	0	0	0	1165600	0	0	948380	0	770610	2884590
S4R324		FRMD4A	tr|S4R324|S4R324_HUMAN FERM domain-containing protein 4A OS=Homo sapiens GN=FRMD4A PE=4 SV=1	1	22.2	8.5188	0	2849000	0	0	0	0	0	0	0	2849000
P20783;P20783-2	Neurotrophin-3	NTF3	sp|P20783|NTF3_HUMAN Neurotrophin-3 OS=Homo sapiens GN=NTF3 PE=1 SV=1;sp|P20783-2|NTF3_HUMAN Isoform 2 of Neurotrophin-3 OS=Homo sapiens GN=NTF3	1	4.7	29.354	0	0	0	2776000	0	0	0	0	0	2776000
P01700	Ig lambda chain V-I region HA		sp|P01700|LV147_HUMAN Immunoglobulin lambda variable 1-47 OS=Homo sapiens GN=IGLV1-47 PE=1 SV=2	2	17.1	12.283	0	0	0	0	0	0	0	0	2765200	2765200
P12111-2;P12111;E7ENL6;P12111-3;P12111-5;P12111-4;C9JNG9	Collagen alpha-3(VI) chain	COL6A3	sp|P12111-2|CO6A3_HUMAN Isoform 2 of Collagen alpha-3(VI) chain OS=Homo sapiens GN=COL6A3;sp|P12111|CO6A3_HUMAN Collagen alpha-3(VI) chain OS=Homo sapiens GN=COL6A3 PE=1 SV=5;tr|E7ENL6|E7ENL6_HUMAN Collagen alpha-3(VI) chain OS=Homo sapiens GN=COL6A3 PE=1	4	1.9	321.35	0	0	0	1945000	795390	0	0	0	0	2740390
P80108	Phosphatidylinositol-glycan-specific phospholipase D	GPLD1	sp|P80108|PHLD_HUMAN Phosphatidylinositol-glycan-specific phospholipase D OS=Homo sapiens GN=GPLD1 PE=1 SV=3	3	5.1	92.335	0	0	0	2733700	0	0	0	0	0	2733700
A0A075B6K5;P80748	Ig lambda chain V-III region LOI	IGLV3-9	tr|A0A075B6K5|A0A075B6K5_HUMAN HCG2043239 (Fragment) OS=Homo sapiens GN=IGLV3-9 PE=1 SV=1;sp|P80748|LV321_HUMAN Immunoglobulin lambda variable 3-21 OS=Homo sapiens GN=IGLV3-21 PE=1 SV=2	1	13.9	12.332	0	0	0	0	0	0	0	0	2724900	2724900
A0A087WVQ9;P68104-2;Q5VTE0;P68104;Q05639;A6PW80;Q5JR01;A0A087WV01	Elongation factor 1-alpha 1;Putative elongation factor 1-alpha-like 3;Elongation factor 1-alpha 2;Elongation factor 1-alpha	EEF1A1;EEF1A1P5;EEF1A2	tr|A0A087WVQ9|A0A087WVQ9_HUMAN Elongation factor 1-alpha 1 OS=Homo sapiens GN=EEF1A1 PE=1 SV=1;sp|P68104-2|EF1A1_HUMAN Isoform 2 of Elongation factor 1-alpha 1 OS=Homo sapiens GN=EEF1A1;sp|Q5VTE0|EF1A3_HUMAN Putative elongation factor 1-alpha-like 3 OS=Hom	2	7	47.883	0	0	0	2394700	0	0	0	0	166430	2561130
A0M8Q6	Ig lambda-7 chain C region	IGLC7	sp|A0M8Q6|IGLC7_HUMAN Immunoglobulin lambda constant 7 OS=Homo sapiens GN=IGLC7 PE=1 SV=3	3	41.5	11.253	0	0	0	0	0	0	0	0	2559400	2559400
G3V5I3;P05154	Plasma serine protease inhibitor	SERPINA3;SERPINA5	tr|G3V5I3|G3V5I3_HUMAN Uncharacterized protein (Fragment) OS=Homo sapiens PE=4 SV=2;sp|P05154|IPSP_HUMAN Plasma serine protease inhibitor OS=Homo sapiens GN=SERPINA5 PE=1 SV=3	2	51.1	4.6041	0	0	0	0	0	0	2530700	0	0	2530700
P22735;H0YN27	Protein-glutamine gamma-glutamyltransferase K	TGM1	sp|P22735|TGM1_HUMAN Protein-glutamine gamma-glutamyltransferase K OS=Homo sapiens GN=TGM1 PE=1 SV=4	3	3.9	89.786	0	644280	0	0	0	0	0	0	1843900	2488180
Q96P63;Q96P63-2	Serpin B12	SERPINB12	sp|Q96P63|SPB12_HUMAN Serpin B12 OS=Homo sapiens GN=SERPINB12 PE=1 SV=1;sp|Q96P63-2|SPB12_HUMAN Isoform 2 of Serpin B12 OS=Homo sapiens GN=SERPINB12	2	4.7	46.276	0	323290	533290	776620	0	0	552270	0	251400	2436870
H7BZK5;B8ZZK2;O75223;M0QZK8;O75223-2;O75223-4	Gamma-glutamylcyclotransferase	GGCT	tr|H7BZK5|H7BZK5_HUMAN Gamma-glutamylcyclotransferase (Fragment) OS=Homo sapiens GN=GGCT PE=1 SV=1;tr|B8ZZK2|B8ZZK2_HUMAN Gamma-glutamylcyclotransferase OS=Homo sapiens GN=GGCT PE=1 SV=1;sp|O75223|GGCT_HUMAN Gamma-glutamylcyclotransferase OS=Homo sapiens G	2	18.5	13.06	0	0	1109900	702120	0	0	0	0	621190	2433210
A0A0A0MRQ5;A0A0A0MSI0;P32119;Q06830	Peroxiredoxin-2;Peroxiredoxin-1	PRDX1;PRDX2	tr|A0A0A0MRQ5|A0A0A0MRQ5_HUMAN Peroxiredoxin-1 OS=Homo sapiens GN=PRDX1 PE=1 SV=1;tr|A0A0A0MSI0|A0A0A0MSI0_HUMAN Peroxiredoxin-1 (Fragment) OS=Homo sapiens GN=PRDX1 PE=1 SV=1;sp|P32119|PRDX2_HUMAN Peroxiredoxin-2 OS=Homo sapiens GN=PRDX2 PE=1 SV=5;sp|Q0683	1	11.3	10.676	0	0	609920	883520	0	0	870440	0	0	2363880
O14791;O14791-2;B1AH96;O14791-3;B1AH94;B1AH95;F8WCH3	Apolipoprotein L1	APOL1	sp|O14791|APOL1_HUMAN Apolipoprotein L1 OS=Homo sapiens GN=APOL1 PE=1 SV=5;sp|O14791-2|APOL1_HUMAN Isoform 2 of Apolipoprotein L1 OS=Homo sapiens GN=APOL1;tr|B1AH96|B1AH96_HUMAN Apolipoprotein L1 (Fragment) OS=Homo sapiens GN=APOL1 PE=1 SV=8;sp|O14791-3|AP	3	10.1	43.974	0	0	0	0	0	0	0	2308200	0	2308200
P47929	Galectin-7	LGALS7	sp|P47929|LEG7_HUMAN Galectin-7 OS=Homo sapiens GN=LGALS7 PE=1 SV=2	2	16.9	15.075	0	0	0	998910	0	0	1253200	0	0	2252110
P12955-3;P12955-2;P12955;V9GYE4	Xaa-Pro dipeptidase	PEPD	sp|P12955-3|PEPD_HUMAN Isoform 3 of Xaa-Pro dipeptidase OS=Homo sapiens GN=PEPD;sp|P12955-2|PEPD_HUMAN Isoform 2 of Xaa-Pro dipeptidase OS=Homo sapiens GN=PEPD;sp|P12955|PEPD_HUMAN Xaa-Pro dipeptidase OS=Homo sapiens GN=PEPD PE=1 SV=3	3	7.2	47.261	0	0	0	0	0	0	2161100	0	0	2161100
Q13835-2;Q13835	Plakophilin-1	PKP1	sp|Q13835-2|PKP1_HUMAN Isoform 1 of Plakophilin-1 OS=Homo sapiens GN=PKP1;sp|Q13835|PKP1_HUMAN Plakophilin-1 OS=Homo sapiens GN=PKP1 PE=1 SV=2	2	3.7	80.496	0	146530	477280	1493200	0	0	0	0	0	2117010
P36955;I3L4Z0	Pigment epithelium-derived factor	SERPINF1	sp|P36955|PEDF_HUMAN Pigment epithelium-derived factor OS=Homo sapiens GN=SERPINF1 PE=1 SV=4;tr|I3L4Z0|I3L4Z0_HUMAN Pigment epithelium-derived factor (Fragment) OS=Homo sapiens GN=SERPINF1 PE=1 SV=1	2	5.5	46.312	0	0	1123900	0	0	0	992680	0	0	2116580
Q14126	Desmoglein-2	DSG2	sp|Q14126|DSG2_HUMAN Desmoglein-2 OS=Homo sapiens GN=DSG2 PE=1 SV=2	2	2.1	122.29	0	0	0	0	2080500	0	0	0	0	2080500
P18428	Lipopolysaccharide-binding protein	LBP	sp|P18428|LBP_HUMAN Lipopolysaccharide-binding protein OS=Homo sapiens GN=LBP PE=1 SV=3	3	7.7	53.383	0	0	0	0	0	2070900	0	0	0	2070900
Q14515-2;Q14515	SPARC-like protein 1	SPARCL1	sp|Q14515-2|SPRL1_HUMAN Isoform 2 of SPARC-like protein 1 OS=Homo sapiens GN=SPARCL1;sp|Q14515|SPRL1_HUMAN SPARC-like protein 1 OS=Homo sapiens GN=SPARCL1 PE=1 SV=2	3	8.3	61.759	0	0	0	1976600	0	0	0	0	0	1976600
Q9NZT1	Calmodulin-like protein 5	CALML5	sp|Q9NZT1|CALL5_HUMAN Calmodulin-like protein 5 OS=Homo sapiens GN=CALML5 PE=1 SV=2	1	9.6	15.892	0	368760	629860	959340	0	0	0	0	0	1957960
A0A087WWY8;A0A0U1RQC7		CFAP99	tr|A0A087WWY8|A0A087WWY8_HUMAN Cilia- and flagella-associated protein 99 OS=Homo sapiens GN=CFAP99 PE=1 SV=1;tr|A0A0U1RQC7|A0A0U1RQC7_HUMAN Cilia- and flagella-associated protein 99 OS=Homo sapiens GN=CFAP99 PE=1 SV=1	1	1.4	74.944	0.0038314	0	0	0	0	1940600	0	0	0	1940600
P06732	Creatine kinase M-type;Creatine kinase M-type, N-terminally processed	CKM	sp|P06732|KCRM_HUMAN Creatine kinase M-type OS=Homo sapiens GN=CKM PE=1 SV=2	3	11	43.101	0	0	1933800	0	0	0	0	0	0	1933800
P32455	Interferon-induced guanylate-binding protein 1	GBP1	sp|P32455|GBP1_HUMAN Guanylate-binding protein 1 OS=Homo sapiens GN=GBP1 PE=1 SV=2	1	2	67.93	0.0072993	0	0	0	0	0	1720400	0	0	1720400
A0A087WWY0;P08519	Apolipoprotein(a)	LPA	tr|A0A087WWY0|A0A087WWY0_HUMAN Apolipoprotein(a) OS=Homo sapiens GN=LPA PE=1 SV=1;sp|P08519|APOA_HUMAN Apolipoprotein(a) OS=Homo sapiens GN=LPA PE=1 SV=1	1	11.4	62.553	0	1261200	448310	0	0	0	0	0	0	1709510
P05109	Protein S100-A8;Protein S100-A8, N-terminally processed	S100A8	sp|P05109|S10A8_HUMAN Protein S100-A8 OS=Homo sapiens GN=S100A8 PE=1 SV=1	1	11.8	10.834	0	332800	0	464460	0	0	901810	0	0	1699070
G3V0E5;P02786	Transferrin receptor protein 1;Transferrin receptor protein 1, serum form	TFRC	tr|G3V0E5|G3V0E5_HUMAN Transferrin receptor (P90, CD71), isoform CRA_c OS=Homo sapiens GN=TFRC PE=1 SV=1;sp|P02786|TFR1_HUMAN Transferrin receptor protein 1 OS=Homo sapiens GN=TFRC PE=1 SV=2	2	3.1	75.963	0	0	0	0	1696000	0	0	0	0	1696000
P19652	Alpha-1-acid glycoprotein 2	ORM2	sp|P19652|A1AG2_HUMAN Alpha-1-acid glycoprotein 2 OS=Homo sapiens GN=ORM2 PE=1 SV=2	3	12.9	23.602	0	0	0	0	0	0	1672100	0	0	1672100
A0A182DWH7;P49908	Selenoprotein P	SEPP1	tr|A0A182DWH7|A0A182DWH7_HUMAN Selenoprotein P (Fragment) OS=Homo sapiens GN=SELENOP PE=1 SV=1;sp|P49908|SEPP1_HUMAN Selenoprotein P OS=Homo sapiens GN=SELENOP PE=1 SV=3	1	3.2	35.116	0	0	0	0	0	0	1615100	0	0	1615100
P06702	Protein S100-A9	S100A9	sp|P06702|S10A9_HUMAN Protein S100-A9 OS=Homo sapiens GN=S100A9 PE=1 SV=1	1	11.4	13.242	0.0074074	0	1590500	0	0	0	0	0	0	1590500
Q6EMK4	Vasorin	VASN	sp|Q6EMK4|VASN_HUMAN Vasorin OS=Homo sapiens GN=VASN PE=1 SV=1	1	1.5	71.712	0	0	0	0	1528300	0	0	0	0	1528300
P00742	Coagulation factor X;Factor X light chain;Factor X heavy chain;Activated factor Xa heavy chain	F10	sp|P00742|FA10_HUMAN Coagulation factor X OS=Homo sapiens GN=F10 PE=1 SV=2	1	3.3	54.731	0	0	0	0	0	0	1521200	0	0	1521200
P48637-2;P48637	Glutathione synthetase	GSS	sp|P48637-2|GSHB_HUMAN Isoform 2 of Glutathione synthetase OS=Homo sapiens GN=GSS;sp|P48637|GSHB_HUMAN Glutathione synthetase OS=Homo sapiens GN=GSS PE=1 SV=1	2	5	40.349	0	0	0	0	0	0	1492100	0	0	1492100
A0A087X0G2		DIO1	tr|A0A087X0G2|A0A087X0G2_HUMAN Type I iodothyronine deiodinase OS=Homo sapiens GN=DIO1 PE=4 SV=1	1	21.4	9.1198	0	0	1375700	0	0	0	0	0	0	1375700
Q96RM1;P35326;P35325;P22532;P22531;Q9BYE4	Small proline-rich protein 2F;Small proline-rich protein 2A;Small proline-rich protein 2B;Small proline-rich protein 2D;Small proline-rich protein 2E;Small proline-rich protein 2G	SPRR2F;SPRR2A;SPRR2B;SPRR2D;SPRR2E;SPRR2G	sp|Q96RM1|SPR2F_HUMAN Small proline-rich protein 2F OS=Homo sapiens GN=SPRR2F PE=3 SV=1;sp|P35326|SPR2A_HUMAN Small proline-rich protein 2A OS=Homo sapiens GN=SPRR2A PE=1 SV=1;sp|P35325|SPR2B_HUMAN Small proline-rich protein 2B OS=Homo sapiens GN=SPRR2B PE	1	12.5	7.8052	0	798660	0	0	0	0	0	0	574590	1373250
G3XAI2;P07942;E7EPA6	Laminin subunit beta-1	LAMB1	tr|G3XAI2|G3XAI2_HUMAN Laminin subunit beta-1 OS=Homo sapiens GN=LAMB1 PE=1 SV=1;sp|P07942|LAMB1_HUMAN Laminin subunit beta-1 OS=Homo sapiens GN=LAMB1 PE=1 SV=2;tr|E7EPA6|E7EPA6_HUMAN Laminin subunit beta-1 OS=Homo sapiens GN=LAMB1 PE=1 SV=1	2	0.9	200.48	0	0	1360500	0	0	0	0	0	0	1360500
P01594;P01593	Ig kappa chain V-I region AU;Ig kappa chain V-I region AG		sp|P01594|KV133_HUMAN Immunoglobulin kappa variable 1-33 OS=Homo sapiens GN=IGKV1-33 PE=1 SV=2;sp|P01593|KVD33_HUMAN Immunoglobulin kappa variable 1D-33 OS=Homo sapiens GN=IGKV1D-33 PE=1 SV=2	1	13.7	12.848	0	0	0	0	0	0	0	0	1317700	1317700
C9JA05;D6RHJ6;D6RD17;P01591	Immunoglobulin J chain	JCHAIN;IGJ	tr|C9JA05|C9JA05_HUMAN Immunoglobulin J chain (Fragment) OS=Homo sapiens GN=JCHAIN PE=1 SV=1;tr|D6RHJ6|D6RHJ6_HUMAN Immunoglobulin J chain (Fragment) OS=Homo sapiens GN=JCHAIN PE=1 SV=1;tr|D6RD17|D6RD17_HUMAN Immunoglobulin J chain (Fragment) OS=Homo sapie	1	17.1	8.1675	0	300190	0	0	0	0	0	0	977880	1278070
P04040	Catalase	CAT	sp|P04040|CATA_HUMAN Catalase OS=Homo sapiens GN=CAT PE=1 SV=3	2	4.6	59.755	0	200880	0	0	0	0	639730	0	418710	1259320
P69905	Hemoglobin subunit alpha	HBA1	sp|P69905|HBA_HUMAN Hemoglobin subunit alpha OS=Homo sapiens GN=HBA1 PE=1 SV=2	1	10.6	15.257	0	0	758990	0	0	0	0	0	496850	1255840
P63267;P68133;P68032;P62736;P63267-2	Actin, gamma-enteric smooth muscle;Actin, alpha skeletal muscle;Actin, alpha cardiac muscle 1;Actin, aortic smooth muscle	ACTG2;ACTA1;ACTC1;ACTA2	sp|P63267|ACTH_HUMAN Actin, gamma-enteric smooth muscle OS=Homo sapiens GN=ACTG2 PE=1 SV=1;sp|P68133|ACTS_HUMAN Actin, alpha skeletal muscle OS=Homo sapiens GN=ACTA1 PE=1 SV=1;sp|P68032|ACTC_HUMAN Actin, alpha cardiac muscle 1 OS=Homo sapiens GN=ACTC1 PE=1	6	15.2	41.876	0	0	1200200	0	0	0	0	0	0	1200200
P23142;P23142-2;P23142-3;H7C1M6;B1AHM7;B1AHM8;B1AHM9;CON__ENSEMBL:ENSBTAP00000016046	Fibulin-1	FBLN1	sp|P23142|FBLN1_HUMAN Fibulin-1 OS=Homo sapiens GN=FBLN1 PE=1 SV=4;sp|P23142-2|FBLN1_HUMAN Isoform A of Fibulin-1 OS=Homo sapiens GN=FBLN1;sp|P23142-3|FBLN1_HUMAN Isoform B of Fibulin-1 OS=Homo sapiens GN=FBLN1	6	10.4	77.213	0	0	0	0	1169300	0	0	0	0	1169300
P27482	Calmodulin-like protein 3	CALML3	sp|P27482|CALL3_HUMAN Calmodulin-like protein 3 OS=Homo sapiens GN=CALML3 PE=1 SV=2	1	8.1	16.891	0	0	0	1111200	0	0	0	0	0	1111200
Q92626	Peroxidasin homolog	PXDN	sp|Q92626|PXDN_HUMAN Peroxidasin homolog OS=Homo sapiens GN=PXDN PE=1 SV=2	2	1.7	165.27	0	0	648550	403560	0	0	0	0	0	1052110
Q16610-2;Q16610;Q16610-4	Extracellular matrix protein 1	ECM1	sp|Q16610-2|ECM1_HUMAN Isoform 2 of Extracellular matrix protein 1 OS=Homo sapiens GN=ECM1;sp|Q16610|ECM1_HUMAN Extracellular matrix protein 1 OS=Homo sapiens GN=ECM1 PE=1 SV=2;sp|Q16610-4|ECM1_HUMAN Isoform 4 of Extracellular matrix protein 1 OS=Homo sapi	1	3.1	46.099	0	332630	0	567310	0	0	0	109430	0	1009370
P08238;Q58FF7	Heat shock protein HSP 90-beta;Putative heat shock protein HSP 90-beta-3	HSP90AB1;HSP90AB3P	sp|P08238|HS90B_HUMAN Heat shock protein HSP 90-beta OS=Homo sapiens GN=HSP90AB1 PE=1 SV=4;sp|Q58FF7|H90B3_HUMAN Putative heat shock protein HSP 90-beta-3 OS=Homo sapiens GN=HSP90AB3P PE=5 SV=1	3	4.1	83.263	0	0	0	0	935200	0	0	0	0	935200
Q96FQ6	Protein S100-A16	S100A16	sp|Q96FQ6|S10AG_HUMAN Protein S100-A16 OS=Homo sapiens GN=S100A16 PE=1 SV=1	1	11.7	11.801	0.003876	0	0	0	0	0	0	0	906890	906890
B7Z2E6;H0YB80;B0AZS6;E7EX29;P63104-2;P63104	14-3-3 protein zeta/delta	YWHAZ	tr|B7Z2E6|B7Z2E6_HUMAN 14-3-3 protein zeta/delta OS=Homo sapiens GN=YWHAZ PE=1 SV=1;tr|H0YB80|H0YB80_HUMAN 14-3-3 protein zeta/delta (Fragment) OS=Homo sapiens GN=YWHAZ PE=1 SV=1;tr|B0AZS6|B0AZS6_HUMAN 14-3-3 protein zeta/delta OS=Homo sapiens GN=YWHAZ PE=	1	9.6	13.985	0	0	0	0	0	0	0	0	891320	891320
P11047	Laminin subunit gamma-1	LAMC1	sp|P11047|LAMC1_HUMAN Laminin subunit gamma-1 OS=Homo sapiens GN=LAMC1 PE=1 SV=3	5	4.8	177.6	0	0	821910	0	0	0	0	0	0	821910
G3V511;G3V3X5;Q14767	Latent-transforming growth factor beta-binding protein 2	LTBP2	tr|G3V511|G3V511_HUMAN Latent-transforming growth factor beta-binding protein 2 OS=Homo sapiens GN=LTBP2 PE=1 SV=1;tr|G3V3X5|G3V3X5_HUMAN Latent-transforming growth factor beta-binding protein 2 OS=Homo sapiens GN=LTBP2 PE=1 SV=1;sp|Q14767|LTBP2_HUMAN Late	2	2	189.24	0	0	820980	0	0	0	0	0	0	820980
P21980-2;P21980	Protein-glutamine gamma-glutamyltransferase 2	TGM2	sp|P21980-2|TGM2_HUMAN Isoform 2 of Protein-glutamine gamma-glutamyltransferase 2 OS=Homo sapiens GN=TGM2;sp|P21980|TGM2_HUMAN Protein-glutamine gamma-glutamyltransferase 2 OS=Homo sapiens GN=TGM2 PE=1 SV=2	1	2.2	61.678	0.0073529	0	0	0	0	0	0	0	745720	745720
P22897;P22897-2	Macrophage mannose receptor 1	MRC1	sp|P22897|MRC1_HUMAN Macrophage mannose receptor 1 OS=Homo sapiens GN=MRC1 PE=1 SV=1;sp|P22897-2|MRC1_HUMAN Isoform 2 of Macrophage mannose receptor 1 OS=Homo sapiens GN=MRC1	2	1.6	166.01	0	0	725790	0	0	0	0	0	0	725790
Q9NR99	Matrix-remodeling-associated protein 5	MXRA5	sp|Q9NR99|MXRA5_HUMAN Matrix-remodeling-associated protein 5 OS=Homo sapiens GN=MXRA5 PE=2 SV=3	1	0.5	312.15	0	0	0	702990	0	0	0	0	0	702990
H0YGZ3;F5H7V9;E9PC84;J3QSU6;P24821-6;P24821-5;P24821-2;P24821-3;P24821-4;P24821	Tenascin	TNC	tr|H0YGZ3|H0YGZ3_HUMAN Tenascin (Fragment) OS=Homo sapiens GN=TNC PE=1 SV=1;tr|F5H7V9|F5H7V9_HUMAN Tenascin OS=Homo sapiens GN=TNC PE=1 SV=1;tr|E9PC84|E9PC84_HUMAN Tenascin OS=Homo sapiens GN=TNC PE=1 SV=1;tr|J3QSU6|J3QSU6_HUMAN Tenascin OS=Homo sapiens GN	1	1.6	66.992	0.0037879	0	694500	0	0	0	0	0	0	694500
Q5T085;P04746-2;P19961-2;P19961;P04746;P04745	Alpha-amylase;Pancreatic alpha-amylase;Alpha-amylase 2B;Alpha-amylase 1	AMY1B;AMY2A;AMY2B;AMY1A	tr|Q5T085|Q5T085_HUMAN Alpha-amylase 1 (Fragment) OS=Homo sapiens GN=AMY1B PE=1 SV=1;sp|P04746-2|AMYP_HUMAN Isoform 2 of Pancreatic alpha-amylase OS=Homo sapiens GN=AMY2A;sp|P19961-2|AMY2B_HUMAN Isoform 2 of Alpha-amylase 2B OS=Homo sapiens GN=AMY2B;sp|P19	1	7.1	25.571	0	0	679570	0	0	0	0	0	0	679570
P01601	Ig kappa chain V-I region HK101		sp|P01601|KVD16_HUMAN Immunoglobulin kappa variable 1D-16 (Fragment) OS=Homo sapiens GN=IGKV1D-16 PE=3 SV=2	1	13.7	12.73	0	0	0	0	0	0	0	0	667460	667460
H7C315;O95954;O95954-2	Formimidoyltransferase-cyclodeaminase;Glutamate formimidoyltransferase;Formimidoyltetrahydrofolate cyclodeaminase	FTCD	tr|H7C315|H7C315_HUMAN Formimidoyltransferase-cyclodeaminase (Fragment) OS=Homo sapiens GN=FTCD PE=1 SV=1;sp|O95954|FTCD_HUMAN Formimidoyltransferase-cyclodeaminase OS=Homo sapiens GN=FTCD PE=1 SV=2;sp|O95954-2|FTCD_HUMAN Isoform C of Formimidoyltransferas	1	6	13.319	0	0	0	0	0	661270	0	0	0	661270
B5MBX0;Q96FF9	Sororin	CDCA5	tr|B5MBX0|B5MBX0_HUMAN Sororin OS=Homo sapiens GN=CDCA5 PE=1 SV=1;sp|Q96FF9|CDCA5_HUMAN Sororin OS=Homo sapiens GN=CDCA5 PE=1 SV=1	1	4.6	33.734	0	639950	0	0	0	0	0	0	0	639950
G3V2W1;Q9UK55	Protein Z-dependent protease inhibitor	SERPINA10	tr|G3V2W1|G3V2W1_HUMAN Protein Z-dependent protease inhibitor OS=Homo sapiens GN=SERPINA10 PE=1 SV=1;sp|Q9UK55|ZPI_HUMAN Protein Z-dependent protease inhibitor OS=Homo sapiens GN=SERPINA10 PE=1 SV=1	1	3.3	55.113	0	0	0	0	0	635150	0	0	0	635150
J3KRG2;Q96QA5	Gasdermin-A	GSDMA	tr|J3KRG2|J3KRG2_HUMAN Gasdermin-A (Fragment) OS=Homo sapiens GN=GSDMA PE=1 SV=8;sp|Q96QA5|GSDMA_HUMAN Gasdermin-A OS=Homo sapiens GN=GSDMA PE=1 SV=4	2	10.1	17.791	0	0	0	0	0	0	0	0	562820	562820
F5H283;Q92563	Testican-2	SPOCK2	tr|F5H283|F5H283_HUMAN Testican-2 OS=Homo sapiens GN=SPOCK2 PE=1 SV=2;sp|Q92563|TICN2_HUMAN Testican-2 OS=Homo sapiens GN=SPOCK2 PE=1 SV=1	1	2.4	46.649	0	0	0	470490	0	0	0	0	0	470490
P25815	Protein S100-P	S100P	sp|P25815|S100P_HUMAN Protein S100-P OS=Homo sapiens GN=S100P PE=1 SV=2	1	13.7	10.4	0	0	0	445280	0	0	0	0	0	445280
A0A0G2JSC0;A0A087WSX0;A0A0G2JS06		IGLV5-45	tr|A0A0G2JSC0|A0A0G2JSC0_HUMAN Immunoglobulin lambda variable 5-45 (Fragment) OS=Homo sapiens GN=IGLV5-45 PE=1 SV=1;sp|A0A087WSX0|LV545_HUMAN Immunoglobulin lambda variable 5-45 OS=Homo sapiens GN=IGLV5-45 PE=3 SV=1;sp|A0A0G2JS06|LV539_HUMAN Immunoglobulin	2	19.5	13.215	0	0	0	0	0	0	0	0	425320	425320
A0A0D9SF54;A0A0D9SGF6;Q13813-3;Q13813;Q13813-2	Spectrin alpha chain, non-erythrocytic 1	SPTAN1	tr|A0A0D9SF54|A0A0D9SF54_HUMAN Spectrin alpha chain, non-erythrocytic 1 OS=Homo sapiens GN=SPTAN1 PE=1 SV=1;tr|A0A0D9SGF6|A0A0D9SGF6_HUMAN Spectrin alpha chain, non-erythrocytic 1 OS=Homo sapiens GN=SPTAN1 PE=1 SV=1;sp|Q13813-3|SPTN1_HUMAN Isoform 3 of Spe	1	0.4	282.83	0.0074349	0	0	416080	0	0	0	0	0	416080
D6RF86;P55285-2;P55285	Cadherin-6	CDH6	tr|D6RF86|D6RF86_HUMAN Cadherin-6 OS=Homo sapiens GN=CDH6 PE=1 SV=1;sp|P55285-2|CADH6_HUMAN Isoform 2 of Cadherin-6 OS=Homo sapiens GN=CDH6;sp|P55285|CADH6_HUMAN Cadherin-6 OS=Homo sapiens GN=CDH6 PE=1 SV=1	1	1.8	67.402	0	0	0	0	368100	0	0	0	0	368100
Q06278	Aldehyde oxidase	AOX1	sp|Q06278|AOXA_HUMAN Aldehyde oxidase OS=Homo sapiens GN=AOX1 PE=1 SV=2	2	1.3	147.92	0	0	0	0	0	0	0	0	351520	351520
A0A075B6S9		IGKV1D-37	tr|A0A075B6S9|A0A075B6S9_HUMAN Immunoglobulin kappa variable 1-37 (non-functional) (Fragment) OS=Homo sapiens GN=IGKV1D-37 PE=1 SV=7	1	13.7	12.688	0	0	0	0	0	0	0	0	312410	312410
H0YAP9;A0A0A0MTC7;A0A0A0MQS9;Q16363-2;Q16363	Laminin subunit alpha-4	LAMA4	tr|H0YAP9|H0YAP9_HUMAN Laminin subunit alpha-4 (Fragment) OS=Homo sapiens GN=LAMA4 PE=1 SV=1;tr|A0A0A0MTC7|A0A0A0MTC7_HUMAN Laminin subunit alpha-4 OS=Homo sapiens GN=LAMA4 PE=1 SV=1;tr|A0A0A0MQS9|A0A0A0MQS9_HUMAN Laminin subunit alpha-4 OS=Homo sapiens GN	1	7.4	20.695	0	0	192790	0	0	0	0	0	0	192790
P0DP09;A0A0B4J2D9		IGKV1D-13	sp|P0DP09|KV113_HUMAN Immunoglobulin kappa variable 1-13 OS=Homo sapiens GN=IGKV1-13 PE=3 SV=1;sp|A0A0B4J2D9|KVD13_HUMAN Immunoglobulin kappa variable 1D-13 OS=Homo sapiens GN=IGKV1D-13 PE=3 SV=1	1	13.7	12.569	0	0	0	0	0	0	0	0	82298	82298
A0A087WV20;A0A087WTU9;A0A087WZY3;Q8TCU4-3;Q8TCU4-2;Q8TCU4	Alstrom syndrome protein 1	ALMS1	tr|A0A087WV20|A0A087WV20_HUMAN Alstrom syndrome protein 1 OS=Homo sapiens GN=ALMS1 PE=1 SV=1;tr|A0A087WTU9|A0A087WTU9_HUMAN Alstrom syndrome protein 1 OS=Homo sapiens GN=ALMS1 PE=1 SV=1;tr|A0A087WZY3|A0A087WZY3_HUMAN Alstrom syndrome protein 1 OS=Homo sapi	1	0.3	425.23	0	0	0	0	0	0	0	0	0	0
A0A087WZI3;M4W6S4;Q6NTF7-4;Q6NTF7-2;Q6NTF7-3;Q6NTF7	DNA dC->dU-editing enzyme APOBEC-3H	APOBEC3H	tr|A0A087WZI3|A0A087WZI3_HUMAN DNA dC->dU-editing enzyme APOBEC-3H OS=Homo sapiens GN=APOBEC3H PE=1 SV=1;tr|M4W6S4|M4W6S4_HUMAN Apolipoprotein B editing enzyme catalytic polypeptide-like 3H OS=Homo sapiens GN=APOBEC3H PE=1 SV=1;sp|Q6NTF7-4|ABC3H_HUMAN Isof	1	5.8	17.782	0.003861	0	0	0	0	0	0	0	0	0
B0YIW2;P02656	Apolipoprotein C-III	APOC3	tr|B0YIW2|B0YIW2_HUMAN Apolipoprotein C-III OS=Homo sapiens GN=APOC3 PE=1 SV=1;sp|P02656|APOC3_HUMAN Apolipoprotein C-III OS=Homo sapiens GN=APOC3 PE=1 SV=1	1	13.7	12.815	0	0	0	0	0	0	0	0	0	0
H0YAS8;H0YC35;P10909-3;P10909-4;P10909;P10909-5;P10909-2	Clusterin;Clusterin;Clusterin beta chain;Clusterin alpha chain	CLU	tr|H0YAS8|H0YAS8_HUMAN Clusterin (Fragment) OS=Homo sapiens GN=CLU PE=1 SV=1;tr|H0YC35|H0YC35_HUMAN Clusterin (Fragment) OS=Homo sapiens GN=CLU PE=1 SV=1;sp|P10909-3|CLUS_HUMAN Isoform 3 of Clusterin OS=Homo sapiens GN=CLU;sp|P10909-4|CLUS_HUMAN Isoform 4	2	24.3	16.066	0	0	0	0	0	0	0	0	0	0
H7C5R6;Q4LE39-2;Q4LE39	AT-rich interactive domain-containing protein 4B	ARID4B	tr|H7C5R6|H7C5R6_HUMAN AT-rich interactive domain-containing protein 4B (Fragment) OS=Homo sapiens GN=ARID4B PE=1 SV=1;sp|Q4LE39-2|ARI4B_HUMAN Isoform 2 of AT-rich interactive domain-containing protein 4B OS=Homo sapiens GN=ARID4B;sp|Q4LE39|ARI4B_HUMAN AT-	1	2.6	76.108	0	0	0	0	0	0	0	0	0	0
