# Supplementary material for: Iron Chelation Therapy Elicits Innate Immune Control of Metastatic Ovarian Cancer
Source: Research Square preprint supplement (doi:10.21203/rs.3.rs-3399219/v1), 2023-10-25
Supplement: Supplementary file 2 [file b7a53341e41e31f9af90057d.xlsx]

## Sheet: Sheet1
Table S3
Gene symbol	P-value (Def vs.Veh)	FDR step up (Def vs.Veh)	Ratio (Def vs.Veh)	Fold change (Def vs.Veh)	LSMean (Def)	LSMean(Veh)
Hspa8	1.82e-12	7.37e-10	0.47	-2.11	1859.99	3917.07
H1f0	2.57e-11	5.76e-09	0.46	-2.19	99.5	218.12
Tdp1	2.1e-10	2.8e-08	0.5	-2.01	17.3	34.73
Bend3	2.18e-10	2.86e-08	0.49	-2.05	20.96	42.98
Pus7l	3.27e-10	3.89e-08	0.41	-2.47	7.84	19.33
Mex3a	7.17e-10	7.11e-08	0.4	-2.48	17.2	42.58
Fmnl1	1.04e-09	9.25e-08	0.47	-2.14	16.74	35.79
D030028A08Rik	1.96e-09	1.49e-07	0.44	-2.3	7.3	16.77
Gm15459	1.01e-08	4.69e-07	0.47	-2.13	5.44	11.6
Mtfp1	3.06e-08	1.05e-06	0.44	-2.26	4.43	10.03
Hpdl	4.88e-08	1.48e-06	0.4	-2.5	3.03	7.58
Arhgef39	1.14e-07	2.77e-06	0.36	-2.81	4.92	13.84
Gm45889	3.04e-07	6e-06	0.35	-2.82	4.2	11.84
Gm50321	3.2e-07	6.28e-06	0.48	-2.09	27.98	58.46
Snhg4	3.51e-07	6.73e-06	0.47	-2.13	14.33	30.51
Sowahd	4.34e-07	8e-06	0.46	-2.16	3.71	8.02
Dnmt3b	5.07e-07	8.98e-06	0.46	-2.16	2.67	5.76
Wdr5b	6.46e-07	1.09e-05	0.44	-2.29	1.39	3.17
Gtdc1	6.63e-07	1.11e-05	0.48	-2.11	1.94	4.08
Bhlha15	6.66e-07	1.11e-05	0.47	-2.13	4.1	8.73
Ankle1	2.65e-06	3.24e-05	0.5	-2.02	5.64	11.39
Dusp9	3.55e-06	4.09e-05	0.5	-2.02	2.15	4.35
Gm49708	5.09e-06	5.43e-05	0.48	-2.09	14.52	30.39
Gm6210	2.1e-05	0.000172	0.36	-2.81	0.52	1.45
Slc26a11	9.03e-05	0.000585	0.49	-2.06	2.41	4.96
Gm49083	9.23e-05	0.000595	0.47	-2.13	2.59	5.51
Gm5931	0.000102	0.000646	0.06	-16.24	0.03	0.41
Gm8203	0.000103	0.000655	0.29	-3.49	1.07	3.72
Gm8355	0.000136	0.000818	0.46	-2.19	0.53	1.15
Gm4149	0.000314	0.00164	0.24	-4.16	0.09	0.37
Gm7232	0.000361	0.00184	0.41	-2.43	0.37	0.91
Gm8326	0.000387	0.00196	0.38	-2.62	0.32	0.83
C630043F03Rik	0.000482	0.00236	0.44	-2.29	0.51	1.17
Gm37819	0.000516	0.00249	0.5	-2.01	0.75	1.51
Gm36026	0.000601	0.00284	0.29	-3.45	0.23	0.79
Gm36423	0.000925	0.00409	0	-1118.55	0	0.11
Ptprcap	0.000946	0.00416	0	-1070.4	0	0.11
Gm49686	0.00109	0.00471	0	-509.64	0	0.29
Tnfrsf25	0.00116	0.00496	0.49	-2.04	0.72	1.47
Gm12020	0.00129	0.00544	0.41	-2.45	0.26	0.63
Mir17hg	0.00158	0.00646	0.47	-2.15	4.12	8.85
Gm49889	0.00204	0.00805	0.04	-28.06	0.01	0.17
Gm45203	0.00223	0.00868	0	-921.59	0	0.09
Gm7899	0.00255	0.00978	0.4	-2.48	0.24	0.6
Actg-ps1	0.00271	0.0103	0.47	-2.13	0.73	1.56
Gm38150	0.00273	0.0103	0.25	-4.06	0.07	0.3
Gm5586	0.00275	0.0104	0.35	-2.82	0.15	0.43
Gm43028	0.003	0.0112	0.49	-2.05	0.41	0.84
1190001M18Rik	0.00313	0.0116	0.35	-2.84	0.15	0.44
Gm42675	0.00315	0.0117	0	-793.79	0	0.08
Gm28229	0.00315	0.0117	0.5	-2	0.69	1.37
B630019A10Rik	0.00345	0.0126	0.36	-2.81	0.2	0.57
Gm47694	0.00352	0.0128	0.46	-2.16	0.54	1.17
Lpar4	0.00548	0.0187	0.32	-3.13	0.11	0.33
Gm1947	0.0056	0.019	0.41	-2.43	0.2	0.48
Gm3379	0.00616	0.0207	0.22	-4.63	0.04	0.2
Gm17802	0.00668	0.0222	0.44	-2.29	0.17	0.4
Tnfrsf11b	0.00675	0.0223	0.43	-2.33	0.17	0.4
H2bc7	0.00684	0.0226	0.08	-12.41	0.01	0.09
Ccnb1-ps	0.00693	0.0228	0.14	-7.04	0.02	0.12
Yy2	0.00744	0.0243	0.22	-4.51	0.87	3.94
Gm18180	0.00758	0.0246	0.41	-2.42	0.41	1
Grin3b	0.00778	0.0252	0.47	-2.12	0.17	0.36
Gm6286	0.00804	0.0259	0.5	-2	0.36	0.72
Gm16433	0.00805	0.0259	0.22	-4.56	0.03	0.16
4732496C06Rik	0.00903	0.0286	0.47	-2.15	0.24	0.51
AC109619.1	0.00913	0.0288	0.39	-2.58	0.15	0.4
Gimap3	0.0102	0.0317	0.31	-3.18	0.07	0.23
Gm6375	0.0109	0.0336	0.45	-2.23	0.2	0.45
6330408M09Rik	0.011	0.0337	0.44	-2.27	0.17	0.38
Gm41760	0.0111	0.0342	0.47	-2.12	0.33	0.71
Gm34091	0.0114	0.0347	0.12	-8.07	0.01	0.07
Clec7a	0.0116	0.0354	0.47	-2.12	0.25	0.54
Trim60	0.012	0.0364	0.09	-10.62	0.01	0.09
Gm29106	0.0122	0.037	0.38	-2.63	0.13	0.35
Gm50186	0.0126	0.0379	0.17	-6.04	0.01	0.08
Gm5826	0.0127	0.0383	0.34	-2.93	0.07	0.21
Gm7551	0.013	0.0389	0.49	-2.05	0.22	0.45
Rps12-ps19	0.0131	0.0391	0.12	-8.16	0.01	0.07
Gm50399	0.0135	0.0402	0.25	-4.08	0.02	0.1
1700092M07Rik	0.0139	0.0413	0.43	-2.33	0.19	0.45
Gm13509	0.0145	0.0427	0.39	-2.54	1.24	3.15
Wnt2	0.0149	0.0437	0.4	-2.51	0.15	0.37
Snapc1l	0.015	0.044	0.27	-3.66	0.09	0.34
Gm13003	0.015	0.044	0.11	-9.19	0.01	0.12
Gm6493	0.0153	0.0447	0.35	-2.84	0.07	0.21
Gm8976	0.0154	0.0449	0.32	-3.09	0.03	0.09
Gm5406	0.0155	0.0451	0.11	-8.77	0.01	0.06
AY036118	0.0155	0.0453	0.39	-2.58	32.64	84.07
Gm12418	0.0156	0.0453	0.16	-6.3	0.01	0.07
Gm5555	0.0163	0.047	0.14	-7.1	0.01	0.06
Rpl28-ps3	0.0168	0.0483	0.4	-2.48	0.14	0.35
Gm44673	0.0169	0.0485	0.13	-7.85	0.01	0.06
Gm9214	0.0169	0.0487	0.11	-9.13	0.01	0.06
Gm43088	0.017	0.0488	0.34	-2.97	0.08	0.23
H3c11	0.0172	0.0491	0.18	-5.5	0.01	0.07
Gm10686	0.0173	0.0496	0.13	-7.74	0.01	0.07
Bnip3	2.6e-18	5.72e-14	29.33	29.33	145.77	4.97
Ndrg1	1.51e-16	1.66e-12	5.15	5.15	536.66	104.16
P4ha2	8.94e-16	6.03e-12	6.07	6.07	157.48	25.93
Bnip3l	1.1e-15	6.03e-12	4.12	4.12	233.63	56.68
Egln3	1.8e-15	7.9e-12	5.5	5.5	151.53	27.53
Pdk1	3.2e-15	1.17e-11	4.77	4.77	152.24	31.95
Cdkn1a	5.3e-15	1.67e-11	5.14	5.14	351.88	68.44
Ccng1	6.84e-15	1.88e-11	3.05	3.05	787.87	258.02
Pfkp	7.88e-15	1.93e-11	3.35	3.35	197.69	59.04
Pmaip1	1.32e-14	2.91e-11	3.51	3.51	93.64	26.68
Ero1l	1.89e-14	3.77e-11	3.59	3.59	250.21	69.61
Tpi1	2.36e-14	3.89e-11	2.58	2.58	1627.31	630.43
Vegfa	2.36e-14	3.89e-11	5.13	5.13	362.24	70.66
Pgm1	2.64e-14	3.89e-11	2.86	2.86	292.04	102.05
Serpine1	2.65e-14	3.89e-11	3.13	3.13	204.56	65.33
Mdm2	2.86e-14	3.93e-11	3.01	3.01	346.82	115.35
Ddias	3.66e-14	4.74e-11	3.52	3.52	118.62	33.75
P4ha1	4.67e-14	5.47e-11	2.66	2.66	218.27	82.05
Txnip	4.72e-14	5.47e-11	3.53	3.53	129.42	36.67
Ldha	5.61e-14	6.17e-11	2.49	2.49	2335.44	938.36
Gm5537	7.1e-14	7.44e-11	2.97	2.97	176.77	59.42
Pdk4	7.89e-14	7.58e-11	2.44	2.44	169.26	69.51
Gys1	7.92e-14	7.58e-11	3.25	3.25	144.94	44.64
Eda2r	8.39e-14	7.7e-11	3.18	3.18	108.9	34.25
Btg2	9.25e-14	8.14e-11	2.6	2.6	140.48	54.04
Egln1	1.05e-13	8.8e-11	2.98	2.98	168.11	56.36
Pgk1-rs7	1.08e-13	8.8e-11	2.97	2.97	157.13	52.84
Kdm3a	1.33e-13	1.05e-10	2.69	2.69	102.68	38.15
Dglucy	1.39e-13	1.06e-10	2.89	2.89	65.02	22.46
Kctd11	2e-13	1.45e-10	3.34	3.34	62.68	18.75
Trp53inp1	2.04e-13	1.45e-10	8.23	8.23	78.79	9.58
Pfkl	2.32e-13	1.6e-10	3.13	3.13	391.34	125.11
Ccng2	2.62e-13	1.75e-10	5.33	5.33	24.83	4.66
Glipr1	3.02e-13	1.95e-10	2.89	2.89	183.27	63.41
Tnfrsf10b	3.46e-13	2.18e-10	2.48	2.48	72.02	29.06
Slc2a1	3.8e-13	2.32e-10	3.12	3.12	284.64	91.3
Fst	4.1e-13	2.41e-10	3.75	3.75	48.8	13.02
Hmox1	4.17e-13	2.41e-10	2.85	2.85	70.68	24.84
Mybl1	4.26e-13	2.41e-10	2.5	2.5	79.73	31.93
Pgam1	4.59e-13	2.52e-10	2.22	2.22	1614.97	727.07
Higd1a	5.45e-13	2.93e-10	3.39	3.39	114.08	33.7
Bhlhe40	6.87e-13	3.6e-10	2.12	2.12	236.6	111.53
Slc16a3	7.13e-13	3.65e-10	4.66	4.66	392.38	84.14
Slc19a2	7.83e-13	3.91e-10	2.75	2.75	81.53	29.64
Sesn2	9.38e-13	4.59e-10	3.99	3.99	100.64	25.24
Fam162a	1.01e-12	4.82e-10	3.98	3.98	168.34	42.34
Cryab	1.06e-12	4.95e-10	3.28	3.28	31.87	9.71
Lpin1	1.15e-12	5.29e-10	4.82	4.82	42.87	8.9
Pgk1	1.2e-12	5.4e-10	2.36	2.36	1974.53	837.49
Aldoa	1.41e-12	6.21e-10	2.07	2.07	1561.4	754.06
Dusp10	1.49e-12	6.43e-10	2.77	2.77	41.6	15.04
Zmat3	1.68e-12	7.09e-10	2.32	2.32	160.98	69.46
Bsg	1.73e-12	7.18e-10	2.01	2.01	494.16	246.22
Plod2	2.19e-12	8.45e-10	2.38	2.38	273.31	114.64
Ddit4	2.37e-12	8.99e-10	8.5	8.5	145.47	17.11
Ccn1	2.44e-12	9.11e-10	2.66	2.66	359.21	135.03
Prelid2	2.54e-12	9.32e-10	7.29	7.29	18.12	2.48
Inka2	2.64e-12	9.51e-10	3.32	3.32	57.63	17.38
Arrdc3	3.26e-12	1.14e-09	3.53	3.53	30.73	8.7
Ephx1	3.32e-12	1.14e-09	2.24	2.24	198.51	88.46
Ier3	3.38e-12	1.14e-09	2.96	2.96	247.4	83.63
Ak4	4.61e-12	1.49e-09	5.93	5.93	48.53	8.18
Fam180a	4.69e-12	1.5e-09	5.86	5.86	14.43	2.46
Rdh10	4.83e-12	1.52e-09	2.26	2.26	130.3	57.55
Bhlhe41	5.39e-12	1.67e-09	3.8	3.8	19.86	5.23
Plekha2	5.53e-12	1.69e-09	2.38	2.38	113.48	47.68
Krt19	5.83e-12	1.76e-09	2.19	2.19	670.83	306.63
Vldlr	6.17e-12	1.84e-09	6.3	6.3	21.23	3.37
Abhd4	6.32e-12	1.84e-09	2.2	2.2	79.27	36.06
Chac1	6.35e-12	1.84e-09	5.07	5.07	22.45	4.42
Lgals3	7.23e-12	2.07e-09	2.19	2.19	238.52	108.97
Klf4	8.54e-12	2.38e-09	3.58	3.58	91.44	25.54
Mxi1	1.18e-11	3.18e-09	2.22	2.22	93.41	42.11
Ak1	1.36e-11	3.59e-09	2.2	2.2	64.11	29.15
Ndufv3	1.41e-11	3.7e-09	2.04	2.04	60.8	29.75
Lamc2	1.46e-11	3.79e-09	2.16	2.16	40.24	18.67
Ampd3	1.68e-11	4.24e-09	2.06	2.06	68.24	33.15
P2rx7	2.01e-11	4.97e-09	2.01	2.01	67.93	33.86
Smtnl2	2.23e-11	5.27e-09	4.26	4.26	15.39	3.61
Rassf1	2.32e-11	5.44e-09	2.18	2.18	105.59	48.33
Pnrc1	2.35e-11	5.44e-09	3.2	3.2	47.75	14.9
Zfp365	2.49e-11	5.66e-09	2.2	2.2	58.71	26.69
Scube3	2.75e-11	6.05e-09	2.16	2.16	221.23	102.56
Ppp1r12b	2.89e-11	6.29e-09	2.03	2.03	137.63	67.65
Tob1	3.05e-11	6.46e-09	2.22	2.22	157.14	70.69
Gm42863	3.26e-11	6.68e-09	4.69	4.69	25.62	5.47
Dusp1	3.28e-11	6.68e-09	2.96	2.96	86.64	29.29
Gpr146	3.49e-11	6.92e-09	7.12	7.12	12.56	1.76
Tmem71	4.15e-11	8.02e-09	3.29	3.29	14.16	4.31
Zbtb8b	4.39e-11	8.34e-09	4.94	4.94	14.94	3.02
Ppp1r3b	4.4e-11	8.34e-09	3.04	3.04	18.29	6.02
Herpud1	4.52e-11	8.46e-09	2.29	2.29	57.18	24.93
Zfyve1	4.54e-11	8.46e-09	2.04	2.04	31.01	15.19
Mindy2	5.39e-11	9.88e-09	2.35	2.35	41.47	17.61
Mab21l3	5.59e-11	1.01e-08	4.97	4.97	7.28	1.47
Polk	5.9e-11	1.04e-08	2.76	2.76	63	22.86
Ciart	6.08e-11	1.06e-08	6.61	6.61	11.36	1.72
Aldoc	6.43e-11	1.1e-08	6.09	6.09	14.59	2.4
Igsf9b	6.45e-11	1.1e-08	2.44	2.44	22.54	9.25
Gm44275	6.48e-11	1.1e-08	3.45	3.45	9.1	2.64
Pqlc3	6.77e-11	1.14e-08	2.34	2.34	29.23	12.49
Heca	7.94e-11	1.29e-08	2.01	2.01	27.54	13.67
9230114K14Rik	7.96e-11	1.29e-08	3.94	3.94	9.27	2.35
Tnfsf9	1.24e-10	1.92e-08	2.87	2.87	12.52	4.36
Plat	1.3e-10	1.98e-08	2.19	2.19	54.23	24.77
Cercam	1.43e-10	2.12e-08	2.43	2.43	29.19	12.01
Nupr1	1.65e-10	2.37e-08	3.03	3.03	27.47	9.05
Crebrf	1.83e-10	2.59e-08	2.32	2.32	18.4	7.95
Acap1	1.87e-10	2.6e-08	9.54	9.54	4.3	0.45
C3	2e-10	2.71e-08	2.44	2.44	176.08	72.22
Areg	2.07e-10	2.78e-08	2.39	2.39	27.13	11.37
Tnfaip3	2.23e-10	2.91e-08	2.06	2.06	73.22	35.62
Acad11	2.26e-10	2.92e-08	2.03	2.03	21.76	10.73
Aldh4a1	2.28e-10	2.92e-08	2.01	2.01	29.42	14.66
Hk1	2.36e-10	3.01e-08	2.13	2.13	270.31	126.67
Rasgrp3	2.54e-10	3.19e-08	2.41	2.41	15.91	6.6
Tcn2	2.6e-10	3.25e-08	2.11	2.11	20.48	9.72
Enpp5	2.7e-10	3.35e-08	2.16	2.16	16.38	7.57
Slc41a2	2.72e-10	3.35e-08	2.23	2.23	30.25	13.58
4930447F24Rik	2.77e-10	3.39e-08	3.44	3.44	10.42	3.03
Foxo3	2.79e-10	3.39e-08	2.04	2.04	99.43	48.75
Natd1	3.24e-10	3.87e-08	2.03	2.03	62.48	30.72
Mgarp	3.48e-10	4.05e-08	4.57	4.57	14.49	3.17
Hpse	3.72e-10	4.29e-08	2.58	2.58	28.47	11.05
Lif	4e-10	4.49e-08	2.45	2.45	68.54	27.93
Tmem130	4.37e-10	4.76e-08	3.22	3.22	6.59	2.05
Sema4f	4.39e-10	4.76e-08	2.86	2.86	10.65	3.72
Hilpda	4.52e-10	4.88e-08	2.47	2.47	23.19	9.38
Dubr	4.61e-10	4.95e-08	2.05	2.05	31.01	15.13
Maff	4.88e-10	5.19e-08	2.32	2.32	51.81	22.33
Cxcl10	6.71e-10	6.77e-08	3.35	3.35	12.49	3.73
Dcxr	6.9e-10	6.88e-08	3.92	3.92	17.7	4.51
Klhl30	6.91e-10	6.88e-08	3.47	3.47	9.73	2.8
9530053A07Rik	7.24e-10	7.14e-08	3.37	3.37	6.61	1.96
Kif21b	7.35e-10	7.22e-08	2.54	2.54	20.99	8.28
Lmo7	7.4e-10	7.23e-08	2.04	2.04	21.63	10.58
Phlda3	9.31e-10	8.61e-08	2.56	2.56	207.32	80.94
Havcr2	9.58e-10	8.82e-08	6.48	6.48	4.43	0.68
9930111J21Rik2	1.01e-09	9.12e-08	3.34	3.34	13.65	4.08
Siglecg	1.02e-09	9.2e-08	2.23	2.23	76.22	34.16
Ptgs2	1.31e-09	1.08e-07	2.29	2.29	40.88	17.86
Trib3	1.35e-09	1.12e-07	2.94	2.94	58.58	19.92
Rcor2	1.77e-09	1.37e-07	2.25	2.25	23.54	10.46
Tsku	1.83e-09	1.42e-07	2.07	2.07	41.15	19.91
Ahnak2	2.05e-09	1.53e-07	3.33	3.33	147.96	44.43
Kcnb1	2.11e-09	1.57e-07	4.24	4.24	7.87	1.86
Cdc42bpg	2.22e-09	1.65e-07	2.69	2.69	102.61	38.14
Apol9b	2.69e-09	1.9e-07	2.74	2.74	7.95	2.9
Prrg4	2.77e-09	1.92e-07	2.49	2.49	104.1	41.84
Ddit4l	2.78e-09	1.92e-07	3.37	3.37	6.65	1.97
Icam1	2.79e-09	1.92e-07	2.73	2.73	8.03	2.94
Acy3	2.82e-09	1.93e-07	2.03	2.03	9.65	4.76
Notch3	3.04e-09	2.04e-07	3.48	3.48	35.59	10.22
Ncald	3.95e-09	2.42e-07	2.3	2.3	19.16	8.34
Mapk4	3.97e-09	2.43e-07	2.26	2.26	20	8.83
Trp53inp2	4.2e-09	2.52e-07	2.14	2.14	41.87	19.55
Rhbdl2	4.24e-09	2.54e-07	2.24	2.24	9.75	4.34
Adrb2	4.98e-09	2.85e-07	2.81	2.81	8.23	2.93
Dlx3	5.37e-09	3.03e-07	2.68	2.68	24.74	9.23
Kdm4b	6.05e-09	3.3e-07	2.12	2.12	45.54	21.46
Nfkbia	6.36e-09	3.43e-07	2.08	2.08	62.59	30.09
Ankrd37	6.47e-09	3.46e-07	5.71	5.71	6.13	1.07
Gpr141	7.24e-09	3.72e-07	2.96	2.96	6.55	2.21
Tbc1d2	7.43e-09	3.76e-07	2.25	2.25	9.24	4.1
Tor3a	8.26e-09	4.07e-07	2.14	2.14	21.49	10.03
Robo3	8.35e-09	4.09e-07	6.19	6.19	2.83	0.46
Tap1	8.4e-09	4.09e-07	2.84	2.84	15.96	5.61
Trim7	8.46e-09	4.1e-07	2.77	2.77	20.54	7.41
G930009F23Rik	9.27e-09	4.41e-07	2.92	2.92	17.45	5.97
C130083M11Rik	1.08e-08	4.95e-07	3.88	3.88	4.31	1.11
Mt1	1.09e-08	4.96e-07	2.45	2.45	36.42	14.88
Pidd1	1.49e-08	6.15e-07	2.38	2.38	48.97	20.54
Vcam1	1.53e-08	6.3e-07	2.49	2.49	11.12	4.47
Gdf15	1.6e-08	6.49e-07	9.38	9.38	34.93	3.72
Edn2	1.6e-08	6.5e-07	2.29	2.29	26.01	11.38
Fosb	1.75e-08	6.99e-07	2.69	2.69	5.76	2.14
Fbxw9	1.76e-08	7.01e-07	2.37	2.37	18.2	7.69
Crispld2	2.14e-08	8.14e-07	3.55	3.55	3.64	1.03
Gm15328	2.2e-08	8.27e-07	2.06	2.06	6.27	3.05
Sema4g	2.29e-08	8.5e-07	2.47	2.47	45.36	18.38
Cxcl1	2.92e-08	1.02e-06	3.5	3.5	7.9	2.26
Gm42546	2.93e-08	1.02e-06	2.24	2.24	61.91	27.66
Azin2	2.96e-08	1.03e-06	2.21	2.21	8.11	3.66
Fbxo32	3.2e-08	1.08e-06	2.66	2.66	7.74	2.91
Apol8	3.43e-08	1.15e-06	4.31	4.31	2.69	0.62
2500002B13Rik	3.73e-08	1.24e-06	2.8	2.8	4.29	1.53
Pbp2	3.75e-08	1.24e-06	3.49	3.49	5.45	1.56
Fam71f1	3.79e-08	1.25e-06	5.64	5.64	4.23	0.75
Abhd18	4.06e-08	1.31e-06	3.01	3.01	6.3	2.09
Atg9b	4.06e-08	1.31e-06	4.34	4.34	35.75	8.23
Gpnmb	4.1e-08	1.32e-06	2.18	2.18	6.59	3.02
Tmem140	4.38e-08	1.38e-06	2.59	2.59	6.09	2.35
Bmf	4.42e-08	1.39e-06	2.18	2.18	11.07	5.07
Ccr7	4.54e-08	1.42e-06	2.35	2.35	8.94	3.8
Fam214b	4.72e-08	1.45e-06	2.29	2.29	12.91	5.65
Gm42923	4.79e-08	1.46e-06	2.47	2.47	77.6	31.45
Atp7b	5.79e-08	1.68e-06	9.55	9.55	2.41	0.25
Elfn2	5.91e-08	1.7e-06	2.61	2.61	13.37	5.13
Bbc3	6.41e-08	1.79e-06	3.62	3.62	15.69	4.33
Rasgef1a	6.49e-08	1.81e-06	3.95	3.95	2.48	0.63
Gadd45g	6.78e-08	1.88e-06	3	3	35.62	11.86
Atp6v0a4	7.1e-08	1.94e-06	2.95	2.95	3.67	1.24
Dhrs9	7.57e-08	2.04e-06	2.86	2.86	4.41	1.54
Gm42653	7.73e-08	2.07e-06	2.25	2.25	41.36	18.4
Glt8d2	8.32e-08	2.17e-06	2.84	2.84	3.26	1.15
Kctd14	9.35e-08	2.38e-06	4.42	4.42	24.87	5.63
Arrdc4	9.52e-08	2.41e-06	2.31	2.31	7.58	3.27
Rora	1.13e-07	2.77e-06	6.08	6.08	1.59	0.26
Fam43a	1.15e-07	2.81e-06	3.28	3.28	4.32	1.32
Kbtbd11	1.18e-07	2.85e-06	5.88	5.88	2.57	0.44
Dixdc1	1.33e-07	3.12e-06	3.77	3.77	2.75	0.73
Fbn1	1.33e-07	3.12e-06	3.01	3.01	4.41	1.47
Slfn2	1.38e-07	3.22e-06	2.1	2.1	4.77	2.27
Apol9a	1.41e-07	3.27e-06	3.05	3.05	4.29	1.4
Gm37091	1.42e-07	3.3e-06	2.19	2.19	8.16	3.73
Ndrg4	1.59e-07	3.63e-06	2.61	2.61	5.01	1.92
Rcan2	1.7e-07	3.83e-06	2.24	2.24	4.5	2.01
Stra6	1.86e-07	4.1e-06	2.58	2.58	5.11	1.98
Clca3a2	2.06e-07	4.43e-06	5.3	5.3	3.13	0.59
Olfr1372-ps1	2.1e-07	4.51e-06	2.24	2.24	87.09	38.91
Parp14	2.1e-07	4.51e-06	2.12	2.12	6.94	3.28
Zfp385a	2.11e-07	4.51e-06	2.14	2.14	51	23.86
Pik3ip1	2.25e-07	4.75e-06	2.13	2.13	11.24	5.29
Lrrn4cl	2.26e-07	4.78e-06	2.36	2.36	4.61	1.95
Slco1a5	2.31e-07	4.85e-06	2.53	2.53	3.9	1.54
Ccl20	2.33e-07	4.88e-06	7.84	7.84	1.54	0.2
Serpinb9b	2.42e-07	5.04e-06	2.82	2.82	4.9	1.74
Dchs2	2.48e-07	5.13e-06	2.02	2.02	11.22	5.55
Cd274	2.61e-07	5.33e-06	2.77	2.77	2.78	1
Rgs4	2.86e-07	5.74e-06	9.46	9.46	1.61	0.17
Tet1	3.78e-07	7.17e-06	2.94	2.94	3.29	1.12
Fas	3.82e-07	7.23e-06	2.65	2.65	3.36	1.27
Gm5987	3.93e-07	7.39e-06	2.58	2.58	8.5	3.3
Papss2	3.93e-07	7.39e-06	2.47	2.47	4.08	1.65
Rasl10b	3.96e-07	7.43e-06	2.06	2.06	8.39	4.08
5830408C22Rik	3.99e-07	7.48e-06	4.72	4.72	1.92	0.41
Mctp2	4.04e-07	7.54e-06	7.61	7.61	2.66	0.35
Gm48362	4.41e-07	8.09e-06	3.38	3.38	4.77	1.41
Dennd2c	4.41e-07	8.09e-06	2.41	2.41	12.36	5.14
Fos	4.41e-07	8.09e-06	2.47	2.47	3.71	1.5
Des	4.74e-07	8.57e-06	3.5	3.5	5.63	1.61
Mycn	4.97e-07	8.84e-06	2.78	2.78	5	1.8
Mgam	5.59e-07	9.67e-06	10.1	10.1	1.22	0.12
Zkscan14	5.71e-07	9.85e-06	2.05	2.05	6.89	3.36
Hyal1	5.79e-07	9.94e-06	3	3	3.02	1.01
Endou	6.22e-07	1.06e-05	2.74	2.74	6.12	2.23
Gm6410	6.48e-07	1.1e-05	3.3	3.3	6.1	1.85
Cyp4f17	6.58e-07	1.11e-05	2.3	2.3	5.49	2.39
B3gnt3	6.7e-07	1.12e-05	2.09	2.09	10.15	4.85
Gm45104	6.76e-07	1.12e-05	2.32	2.32	10.2	4.4
Gm11110	7.55e-07	1.22e-05	2.44	2.44	3.85	1.58
Oit3	7.66e-07	1.23e-05	2.92	2.92	5.95	2.03
Tent5c	7.79e-07	1.25e-05	2.09	2.09	6.09	2.91
Camk2b	7.88e-07	1.26e-05	3.81	3.81	2.14	0.56
Synm	7.9e-07	1.26e-05	2.8	2.8	2.37	0.85
Cubn	8.11e-07	1.29e-05	2.53	2.53	6.38	2.52
Gm13230	8.48e-07	1.33e-05	2.01	2.01	10.66	5.3
Cd209c	8.8e-07	1.37e-05	2.35	2.35	28.9	12.31
Pitpnc1	9.52e-07	1.46e-05	2.29	2.29	4.19	1.83
Cd55	9.59e-07	1.46e-05	2.01	2.01	5.8	2.89
2610528A11Rik	9.95e-07	1.51e-05	10.04	10.04	2.86	0.29
Mt2	1.06e-06	1.59e-05	2.29	2.29	3.87	1.69
Hoga1	1.13e-06	1.68e-05	2.58	2.58	2.03	0.79
Fgf1	1.2e-06	1.75e-05	2.99	2.99	3.63	1.21
Axdnd1	1.23e-06	1.78e-05	2.21	2.21	3.48	1.58
Gm13415	1.27e-06	1.82e-05	2.64	2.64	3.65	1.38
Trim12c	1.29e-06	1.84e-05	2.87	2.87	3.16	1.1
Slc4a11	1.33e-06	1.88e-05	2.22	2.22	2.89	1.3
Acvrl1	1.5e-06	2.08e-05	8.71	8.71	1.03	0.12
Gm9949	1.65e-06	2.23e-05	3.61	3.61	2.04	0.56
C3ar1	1.72e-06	2.3e-05	3.4	3.4	1.78	0.52
Jag2	1.86e-06	2.47e-05	2.17	2.17	12.41	5.73
Trp53cor1	2.02e-06	2.61e-05	5.32	5.32	2.54	0.48
Sesn3	2.1e-06	2.69e-05	2.2	2.2	3.62	1.65
4933427I04Rik	2.16e-06	2.75e-05	2.14	2.14	5.3	2.47
Speer3	2.17e-06	2.76e-05	3.31	3.31	3.39	1.02
Mrvi1	2.41e-06	3e-05	5.63	5.63	1.27	0.22
Susd2	2.41e-06	3e-05	3.46	3.46	2.34	0.67
Zfp750	2.49e-06	3.09e-05	11.11	11.11	1.36	0.12
Zfp607b	2.78e-06	3.37e-05	2.61	2.61	2.57	0.98
Zfp469	2.86e-06	3.45e-05	7.14	7.14	1.43	0.2
Hrh1	2.88e-06	3.46e-05	2.13	2.13	3.39	1.59
Ypel3	2.89e-06	3.46e-05	2.49	2.49	4.76	1.91
Celf5	3.03e-06	3.61e-05	4.13	4.13	1.24	0.3
Mamdc2	3.11e-06	3.69e-05	4.26	4.26	1.51	0.35
Pkd1l1	3.12e-06	3.7e-05	4.46	4.46	1.45	0.32
Cd80	3.14e-06	3.72e-05	5.91	5.91	0.94	0.16
Sec14l5	3.29e-06	3.87e-05	5.82	5.82	1.57	0.27
Oacyl	3.39e-06	3.96e-05	2.17	2.17	5.03	2.32
Vil1	3.61e-06	4.15e-05	2.85	2.85	1.98	0.69
5830418P13Rik	3.75e-06	4.3e-05	5.14	5.14	1.63	0.32
Exph5	3.76e-06	4.3e-05	2.44	2.44	2.07	0.85
Nectin4	3.99e-06	4.5e-05	4.72	4.72	1.82	0.39
Prr36	4e-06	4.5e-05	2.03	2.03	5.03	2.47
Hk1os	4.39e-06	4.86e-05	2.8	2.8	1.78	0.64
Ptpn22	4.46e-06	4.91e-05	5.86	5.86	0.88	0.15
Glipr2	4.48e-06	4.92e-05	2.92	2.92	2.54	0.87
Slc16a4	4.66e-06	5.08e-05	2.41	2.41	4.12	1.71
1810062G17Rik	4.7e-06	5.12e-05	3	3	2.23	0.74
Dnaaf1	4.83e-06	5.22e-05	6.64	6.64	1.07	0.16
Hmcn2	4.96e-06	5.32e-05	5.43	5.43	1.45	0.27
Calr4	5.11e-06	5.45e-05	6.47	6.47	0.77	0.12
Bmp8a	5.16e-06	5.48e-05	3.66	3.66	1.98	0.54
Camsap3	5.49e-06	5.77e-05	2.34	2.34	3.53	1.51
Sprr1a	5.52e-06	5.79e-05	2.13	2.13	7.24	3.4
Dyrk1b	5.54e-06	5.79e-05	2.29	2.29	4.9	2.14
Gm6650	5.85e-06	6.08e-05	3.9	3.9	1.73	0.44
Bsn	6.09e-06	6.3e-05	2.47	2.47	4.12	1.67
Gm16170	6.42e-06	6.58e-05	3.33	3.33	1.91	0.57
Myom2	7.07e-06	7.1e-05	3.47	3.47	1.23	0.35
9930111J21Rik1	7.19e-06	7.19e-05	3.9	3.9	2.93	0.75
AC161757.1	7.28e-06	7.27e-05	12.05	12.05	0.92	0.08
Gm11331	7.43e-06	7.38e-05	2.96	2.96	5.87	1.98
Tgtp2	7.43e-06	7.38e-05	3.1	3.1	1.77	0.57
Myh14	7.5e-06	7.42e-05	2.03	2.03	2.58	1.27
Gm37855	7.99e-06	7.79e-05	3.12	3.12	1.35	0.43
Jsrp1	8.36e-06	8.1e-05	2.78	2.78	1.53	0.55
Rasl11b	8.4e-06	8.13e-05	2.09	2.09	3.94	1.88
Rgs11	8.9e-06	8.53e-05	2.54	2.54	9.78	3.85
Gbp7	8.92e-06	8.54e-05	4.14	4.14	1.29	0.31
Aire	1.02e-05	9.55e-05	5776.18	5776.18	0.58	0
1700023B13Rik	1.05e-05	9.83e-05	4.92	4.92	1.47	0.3
Lypd1	1.06e-05	9.89e-05	2.29	2.29	2.47	1.08
Ttc38	1.17e-05	0.000107	2.06	2.06	3.16	1.54
Plet1	1.2e-05	0.000109	3.11	3.11	1.56	0.5
Wdr54	1.28e-05	0.000116	2.06	2.06	3.18	1.54
Gm37795	1.35e-05	0.000121	3.68	3.68	8.91	2.42
Tnfrsf26	1.36e-05	0.000121	2.92	2.92	1.23	0.42
Peli3	1.43e-05	0.000127	2.07	2.07	2.76	1.33
Ccl9	1.44e-05	0.000127	2.2	2.2	2.31	1.05
Gm16754	1.47e-05	0.000129	3.04	3.04	3.53	1.16
Col15a1	1.77e-05	0.00015	2.56	2.56	1.95	0.76
Defb42	1.85e-05	0.000156	2.02	2.02	2.16	1.07
Dnajc28	1.97e-05	0.000164	2.18	2.18	2.05	0.94
Oasl2	2.01e-05	0.000167	2.13	2.13	2.23	1.05
Map3k7cl	2.04e-05	0.000168	2.69	2.69	1.45	0.54
Ace	2.17e-05	0.000177	2.18	2.18	2.35	1.08
Lncenc1	2.33e-05	0.000188	2.87	2.87	1.81	0.63
Gm19589	2.35e-05	0.000189	2.84	2.84	2.1	0.74
Gm3716	2.37e-05	0.00019	3.58	3.58	2.15	0.6
Fbxw10	2.41e-05	0.000193	2.89	2.89	1.85	0.64
Zc3h6	2.46e-05	0.000196	2.12	2.12	1.76	0.83
Shc2	2.68e-05	0.00021	3.32	3.32	1.43	0.43
Susd1	2.91e-05	0.000225	8.09	8.09	0.56	0.07
2900052L18Rik	2.96e-05	0.000228	4.27	4.27	2.35	0.55
Selenbp1	3.03e-05	0.000233	7.51	7.51	1.78	0.24
Map3k8	3.45e-05	0.000259	2.06	2.06	1.83	0.89
Lpin3	3.63e-05	0.00027	2.97	2.97	1.42	0.48
Fam161a	3.64e-05	0.000271	2.44	2.44	1.47	0.6
Ctsf	3.65e-05	0.000271	3.02	3.02	1.59	0.53
Srgap3	3.67e-05	0.000272	2.19	2.19	2.31	1.06
Tnfsf4	3.81e-05	0.00028	6.6	6.6	0.6	0.09
Pnp2	3.89e-05	0.000286	2.2	2.2	2.7	1.23
Kank4os	4.15e-05	0.000304	2.48	2.48	1.27	0.51
Zfp185	4.2e-05	0.000306	2.17	2.17	2.73	1.26
Lrp2bp	4.26e-05	0.00031	5.44	5.44	0.77	0.14
Ccn3	4.97e-05	0.000353	3.91	3.91	0.79	0.2
Baalc	5.02e-05	0.000356	2.46	2.46	2.38	0.97
Glrp1	5.06e-05	0.000358	4.48	4.48	0.74	0.17
Ano3	5.1e-05	0.00036	3.41	3.41	1.04	0.31
Fkbp1b	5.1e-05	0.00036	2.21	2.21	2.2	1
Tafa5	5.19e-05	0.000366	2.4	2.4	2.03	0.84
Gm41724	5.79e-05	0.000403	2.2	2.2	2.78	1.26
Samd12	6.36e-05	0.000435	2.33	2.33	5.49	2.35
Gm17251	7.02e-05	0.000473	2.24	2.24	2.85	1.27
Acvr1c	7.03e-05	0.000474	4.73	4.73	0.64	0.13
Tmem95	7.31e-05	0.000488	3.39	3.39	1.33	0.39
Thsd1	7.34e-05	0.00049	2.21	2.21	1.22	0.55
B230206L02Rik	7.36e-05	0.000491	2.32	2.32	1.3	0.56
Msl3l2	7.57e-05	0.000504	2.81	2.81	2.45	0.87
Irgm2	8.8e-05	0.000572	2.16	2.16	1.39	0.65
Gm5421	8.8e-05	0.000572	2.09	2.09	1.57	0.75
Tnfsf18	8.99e-05	0.000583	3.63	3.63	0.58	0.16
1700007K13Rik	9.05e-05	0.000585	4.1	4.1	0.64	0.16
Tmc8	9.18e-05	0.000593	2.12	2.12	2.36	1.11
Frat1	9.99e-05	0.000636	3.53	3.53	0.9	0.25
Mst1	0.000103	0.000655	2.54	2.54	1.99	0.79
Flacc1	0.000104	0.000661	3.04	3.04	0.79	0.26
Gm20521	0.000105	0.000663	2.27	2.27	1.88	0.83
1600014C23Rik	0.000106	0.000668	2592.44	2592.44	0.26	0
Myo16	0.000107	0.000671	3.93	3.93	0.67	0.17
Robo4	0.000107	0.000673	3.65	3.65	1.22	0.33
Adhfe1	0.000107	0.000673	2.12	2.12	1.89	0.89
Evi2a	0.000109	0.000683	9.35	9.35	0.33	0.04
S100a7a	0.000116	0.000715	6	6	1.1	0.18
Olfml2a	0.000121	0.000745	2.9	2.9	1.12	0.38
Gm47416	0.000139	0.000831	2.92	2.92	0.68	0.23
Synpo2	0.000141	0.00084	8.21	8.21	1.12	0.14
F13a1	0.000143	0.00085	5.75	5.75	0.33	0.06
Inka1	0.000143	0.000851	4.01	4.01	0.72	0.18
Cbs	0.000145	0.000861	2.15	2.15	1.82	0.85
Slc13a4	0.000148	0.000875	4.91	4.91	1.64	0.33
Gm37194	0.000153	0.000902	8.8	8.8	0.65	0.07
Pappa2	0.000155	0.000909	2.21	2.21	1.2	0.54
Brd3os	0.000155	0.000911	2.71	2.71	0.73	0.27
Fat2	0.000158	0.000922	5.97	5.97	0.51	0.09
Junb	0.000164	0.000951	2.34	2.34	67.3	28.76
Iqcg	0.000167	0.000966	2.61	2.61	1.63	0.62
Espnl	0.000169	0.000975	3.03	3.03	0.79	0.26
2810408A11Rik	0.000174	0.001	2.54	2.54	1.91	0.75
Cpt1c	0.000176	0.00101	3.26	3.26	1.55	0.48
A630072M18Rik	0.000179	0.00102	2.16	2.16	7.07	3.27
Cabp1	0.000181	0.00103	2.2	2.2	1.59	0.72
Ccl5	0.000182	0.00104	2.28	2.28	3.04	1.33
Serping1	0.000184	0.00104	2.25	2.25	3.1	1.38
2600006K01Rik	0.00019	0.00107	2.5	2.5	1.12	0.45
Arhgap40	0.000193	0.00109	5.09	5.09	0.43	0.09
4933411K16Rik	0.000196	0.0011	4.57	4.57	0.67	0.15
Ccdc65	0.000197	0.0011	2.52	2.52	0.8	0.32
9530026P05Rik	0.000198	0.00111	2.01	2.01	1.83	0.91
Gm32051	0.000203	0.00113	2.48	2.48	2.29	0.93
Fcgr4	0.000207	0.00115	3.04	3.04	0.81	0.27
A930024E05Rik	0.00021	0.00117	2.07	2.07	1.9	0.92
Gm43809	0.000212	0.00118	2.57	2.57	0.74	0.29
M1ap	0.000218	0.0012	2.46	2.46	1.77	0.72
Gm4735	0.000222	0.00122	3.06	3.06	0.83	0.27
Sema6b	0.000223	0.00123	4.05	4.05	0.84	0.21
Mmp28	0.000224	0.00123	2.46	2.46	1.32	0.54
Lamc3	0.000224	0.00123	4.93	4.93	0.7	0.14
Igtp	0.000225	0.00124	2.72	2.72	1	0.37
Gm10369	0.000226	0.00124	2.89	2.89	0.82	0.28
Shpk	0.000227	0.00125	2.17	2.17	2.13	0.98
Gm26917	0.000229	0.00126	2.43	2.43	163.91	67.58
Usp17la	0.00023	0.00126	6.24	6.24	0.89	0.14
Gm11413	0.00023	0.00126	2.3	2.3	1.07	0.47
Slc39a4	0.00025	0.00135	3.74	3.74	0.73	0.2
6430590A07Rik	0.000253	0.00137	2.59	2.59	0.76	0.29
Fam71f2	0.000255	0.00137	3.19	3.19	0.56	0.18
Pla1a	0.000255	0.00137	2.53	2.53	1.35	0.54
Art2a	0.000266	0.00142	8.08	8.08	0.34	0.04
Tbc1d10c	0.000266	0.00142	2.14	2.14	1.21	0.57
Il18	0.000283	0.0015	2.09	2.09	1.87	0.9
Rapsn	0.000283	0.0015	6.78	6.78	0.33	0.05
Zfp819	0.000301	0.00158	3.79	3.79	0.51	0.14
Sh2d3c	0.000303	0.00159	2.24	2.24	1.29	0.58
Ube2u	0.000305	0.0016	2.65	2.65	0.77	0.29
Gm13073	0.00031	0.00161	3.13	3.13	0.58	0.19
Arg1	0.000317	0.00165	6.43	6.43	0.37	0.06
Scn3a	0.000322	0.00167	2.33	2.33	1.09	0.47
Gm16046	0.000328	0.0017	2.64	2.64	0.87	0.33
Galm	0.000331	0.00171	2.01	2.01	2.91	1.45
Tgtp1	0.000336	0.00173	2.67	2.67	2	0.75
Crybg2	0.000341	0.00176	2.1	2.1	1	0.48
Ankrd55	0.000351	0.0018	3.36	3.36	0.86	0.26
Socs1	0.000356	0.00183	2.85	2.85	1.03	0.36
Rubcnl	0.000358	0.00183	3.89	3.89	0.79	0.2
Gm49759	0.00036	0.00184	2.09	2.09	75.43	36.05
Cst6	0.000368	0.00188	2.07	2.07	2.34	1.13
Adgrf5	0.000372	0.00189	4.54	4.54	0.38	0.08
Trim5	0.000376	0.00191	3.28	3.28	0.54	0.16
Efhb	0.000385	0.00195	2.03	2.03	1.13	0.56
Bcl2l15	0.000386	0.00195	3.56	3.56	0.63	0.18
Gm15731	0.000388	0.00196	4.42	4.42	0.57	0.13
4933433H22Rik	0.000393	0.00198	2.88	2.88	0.74	0.26
Abcb1a	0.000394	0.00199	6.31	6.31	0.68	0.11
Gpr132	0.000408	0.00205	2.33	2.33	1.08	0.46
Neurl3	0.000411	0.00206	2.14	2.14	1.01	0.47
D830044D21Rik	0.000415	0.00208	2.83	2.83	0.73	0.26
Frg2f1	0.000423	0.00211	2.44	2.44	1.35	0.55
Gm12758	0.000427	0.00213	2.46	2.46	2.69	1.09
Gm38253	0.000444	0.0022	2.05	2.05	1.53	0.74
Gm8257	0.000459	0.00226	2.48	2.48	0.89	0.36
Gbp4	0.000461	0.00227	5.3	5.3	0.37	0.07
Pde8b	0.000466	0.00229	3.13	3.13	1	0.32
Gbp6	0.000476	0.00233	2.71	2.71	0.8	0.29
Guca1a	0.000491	0.00239	2.35	2.35	0.81	0.35
Etaa1os	0.000493	0.0024	3.23	3.23	0.52	0.16
2310067P03Rik	0.000509	0.00247	2.7	2.7	1.46	0.54
Barx2	0.000515	0.00249	6.52	6.52	1.04	0.16
Cass4	0.000524	0.00253	2.9	2.9	0.61	0.21
C1s2	0.000524	0.00253	2.27	2.27	1.55	0.68
Psme2b	0.000546	0.00262	3.61	3.61	0.78	0.22
Gm47175	0.000547	0.00262	2.28	2.28	1.12	0.49
Gm16278	0.000551	0.00264	2.79	2.79	1.31	0.47
Iqank1	0.000555	0.00265	2.61	2.61	0.78	0.3
Slc35f3	0.000562	0.00268	4.63	4.63	0.3	0.06
Taco1os	0.000589	0.0028	4.97	4.97	0.48	0.1
Hsf2bp	0.00059	0.0028	2.54	2.54	0.64	0.25
Dbhos	0.000602	0.00285	3.31	3.31	2.26	0.68
Syngr4	0.000603	0.00285	2.48	2.48	0.58	0.23
Gm43469	0.000615	0.0029	3.72	3.72	0.37	0.1
Alox5ap	0.000639	0.00299	2.81	2.81	0.57	0.2
Atp2a3	0.000643	0.003	5.67	5.67	0.37	0.06
Serpina3g	0.000663	0.00308	3.1	3.1	0.68	0.22
Ifitm10	0.000667	0.0031	2.25	2.25	1.03	0.46
Prrt4	0.000703	0.00324	2.39	2.39	0.85	0.36
AV356131	0.000705	0.00324	2.16	2.16	1.01	0.47
Aatk	0.000714	0.00328	1383.68	1383.68	0.14	0
Gm527	0.000723	0.00331	2.31	2.31	1.18	0.51
4930562F07Rik	0.000732	0.00335	1656.05	1656.05	0.17	0
Gm12514	0.000766	0.00348	3.47	3.47	1.21	0.35
Gm10532	0.000788	0.00356	4.16	4.16	0.55	0.13
Hcn2	0.00085	0.00381	2.04	2.04	1.22	0.6
4932415D10Rik	0.000853	0.00382	2.09	2.09	1.69	0.81
Gm48709	0.000874	0.0039	2.3	2.3	0.74	0.32
Nlrp2	0.00088	0.00393	3.38	3.38	0.62	0.18
Gnaz	0.000911	0.00404	2.59	2.59	0.75	0.29
Gm30873	0.000914	0.00405	3.35	3.35	0.6	0.18
1700020D05Rik	0.000931	0.00411	2.83	2.83	0.6	0.21
Gm43289	0.000943	0.00415	6.43	6.43	0.23	0.04
Gm44997	0.000943	0.00415	2.55	2.55	1.14	0.45
Pik3ap1	0.000951	0.00418	2.77	2.77	1.01	0.37
Galr2	0.000956	0.0042	2.17	2.17	1.23	0.57
Trpm8	0.000964	0.00422	1277.7	1277.7	0.13	0
Rsph9	0.000974	0.00427	5.99	5.99	0.37	0.06
Arl11	0.000989	0.00432	7.81	7.81	0.22	0.03
4833418N02Rik	0.000992	0.00433	2.19	2.19	0.9	0.41
Slc1a2	0.000999	0.00435	4.9	4.9	0.63	0.13
D730045A05Rik	0.001	0.00437	3.08	3.08	0.73	0.24
H60b	0.00102	0.00442	2.25	2.25	0.63	0.28
Podn	0.00102	0.00443	3.62	3.62	0.6	0.16
D030040B21Rik	0.00102	0.00445	2	2	1.04	0.52
Gm44274	0.00111	0.00477	5.49	5.49	0.23	0.04
Gper1	0.00113	0.00487	2.97	2.97	0.66	0.22
Tnfrsf18	0.00115	0.00493	2.23	2.23	1.03	0.46
Adgrv1	0.00117	0.00501	5.33	5.33	0.38	0.07
Gm20517	0.00117	0.00501	2.11	2.11	3.57	1.69
C430002N11Rik	0.0012	0.00514	3.8	3.8	0.61	0.16
Ddr2	0.00121	0.00514	2.7	2.7	0.85	0.32
Ceacam16	0.00125	0.0053	2.69	2.69	0.58	0.22
Gm32540	0.0013	0.00548	3.46	3.46	0.43	0.12
Gdf9	0.00131	0.0055	2.98	2.98	0.56	0.19
Prss27	0.00132	0.00553	3.1	3.1	0.54	0.18
Klhl33	0.00133	0.00558	2.43	2.43	0.59	0.24
Enkur	0.00134	0.00561	2.77	2.77	0.91	0.33
Tnfsf15	0.00141	0.00586	3.51	3.51	0.63	0.18
Csf2	0.00141	0.00586	1267.7	1267.7	0.13	0
Gm36696	0.00141	0.00586	1168.5	1168.5	0.12	0
Cfap46	0.00143	0.00593	4.84	4.84	0.43	0.09
Cnga3	0.00145	0.00599	4.13	4.13	0.4	0.1
Sla	0.00149	0.00615	2.61	2.61	0.75	0.29
Gm13203	0.0015	0.00619	3.03	3.03	0.58	0.19
Abcb9	0.00152	0.00624	2.14	2.14	0.88	0.41
Gm45670	0.00153	0.0063	924.87	924.87	0.09	0
Camkk1	0.00156	0.00639	2.06	2.06	1.29	0.62
Cnksr3	0.00156	0.00641	2.35	2.35	0.92	0.39
Gm16537	0.00159	0.00651	2.09	2.09	0.84	0.4
Psmb9	0.00161	0.00656	2.82	2.82	0.41	0.15
Gm41361	0.00163	0.00663	1012.55	1012.55	0.1	0
D630023F18Rik	0.00163	0.00664	1017.57	1017.57	0.1	0
Gm8935	0.00167	0.00676	2.75	2.75	0.42	0.15
Lama3	0.00167	0.00679	3.84	3.84	0.46	0.12
4933426B08Rik	0.00175	0.00705	3.54	3.54	0.3	0.08
Gm26877	0.00175	0.00705	2.74	2.74	0.63	0.23
Gm26569	0.00182	0.00729	2.48	2.48	0.82	0.33
Gm16172	0.00184	0.00738	2.46	2.46	0.67	0.27
Gm47572	0.00184	0.00738	2.72	2.72	0.47	0.17
Ang2	0.00185	0.0074	4.45	4.45	0.6	0.14
Lrp2	0.00186	0.00744	2.81	2.81	0.75	0.27
Gm9530	0.00189	0.00753	4.35	4.35	0.46	0.11
Egr2	0.00189	0.00754	2.85	2.85	0.45	0.16
Plcl1	0.00189	0.00755	2.13	2.13	0.76	0.35
Rasl10a	0.0019	0.00759	2.24	2.24	0.99	0.44
Gm42141	0.00193	0.00766	3.66	3.66	0.7	0.19
Gpr35	0.00204	0.00806	4.62	4.62	0.3	0.06
Gm15246	0.00209	0.00823	2.08	2.08	0.9	0.43
Gm49735	0.0021	0.00826	846.42	846.42	0.08	0
Spats1	0.0021	0.00826	2.18	2.18	0.54	0.25
Naip5	0.00211	0.00828	2.02	2.02	0.69	0.34
Gm14137	0.00212	0.00831	2.24	2.24	1.44	0.64
Lman1l	0.00217	0.00851	29.12	29.12	0.2	0.01
Prg4	0.0022	0.00858	2.43	2.43	0.74	0.3
3830432H09Rik	0.00234	0.00907	4.86	4.86	0.2	0.04
Gm47513	0.00238	0.0092	4.69	4.69	0.39	0.08
Olfr846	0.00244	0.00937	751.05	751.05	0.08	0
Dusp15	0.00245	0.00941	2.39	2.39	0.61	0.26
Scn5a	0.00248	0.00953	2.11	2.11	0.66	0.31
Tbx20	0.00257	0.00982	4.27	4.27	0.31	0.07
Spint2	0.0026	0.00994	2.88	2.88	0.57	0.2
Slit1	0.0026	0.00995	2.44	2.44	0.98	0.4
Gm37580	0.00264	0.0101	918.59	918.59	0.09	0
Ffar4	0.00267	0.0102	22.34	22.34	0.16	0.01
Svop	0.00269	0.0102	4.52	4.52	0.31	0.07
Rsad2	0.00271	0.0103	4.32	4.32	0.59	0.14
Clrn1	0.00272	0.0103	816.05	816.05	0.08	0
Egfros	0.00277	0.0105	3.79	3.79	0.47	0.12
Tph1	0.0028	0.0106	20.12	20.12	0.17	0.01
Gm45076	0.00284	0.0107	3.34	3.34	0.38	0.11
Sema4d	0.00286	0.0108	2.9	2.9	0.35	0.12
Abcc12	0.00292	0.011	2.06	2.06	0.69	0.33
Gm48089	0.00296	0.0111	878.77	878.77	0.09	0
B230303A05Rik	0.00302	0.0113	721.48	721.48	0.07	0
H2-K2	0.00303	0.0113	2.87	2.87	0.73	0.26
Ankrd2	0.00304	0.0113	664.67	664.67	0.07	0
Tnmd	0.0031	0.0115	2.28	2.28	0.5	0.22
Igf2bp3	0.00311	0.0116	3.28	3.28	0.31	0.09
Gbp9	0.00312	0.0116	2.64	2.64	0.51	0.19
Epm2a	0.00315	0.0117	3.99	3.99	0.78	0.2
Clec2d	0.00317	0.0117	2.02	2.02	0.77	0.38
Gm33594	0.00319	0.0118	741.82	741.82	0.07	0
Ccdc88b	0.00322	0.0119	2.2	2.2	0.51	0.23
1700003M07Rik	0.00322	0.0119	27.69	27.69	0.19	0.01
D030007L05Rik	0.00324	0.0119	765.31	765.31	0.08	0
Gm26576	0.00324	0.012	3.21	3.21	0.27	0.08
Spib	0.00327	0.0121	2.62	2.62	0.63	0.24
Zfp980	0.00328	0.0121	2.92	2.92	0.51	0.18
Apol7a	0.00329	0.0121	3.5	3.5	0.4	0.11
Pnliprp2	0.00333	0.0122	14.46	14.46	0.19	0.01
Spns3	0.00335	0.0123	2.01	2.01	1.07	0.53
Necab3	0.00343	0.0125	2.38	2.38	0.63	0.26
Hic1	0.00347	0.0127	3.02	3.02	0.35	0.11
Gm37536	0.00354	0.0128	3.04	3.04	0.36	0.12
Gm49391	0.00356	0.0129	2.39	2.39	1.38	0.58
Gm15638	0.00362	0.0131	3.84	3.84	0.37	0.1
Pgam1-ps2	0.00363	0.0131	2.57	2.57	2.67	1.04
Olig3	0.00368	0.0133	3.8	3.8	0.29	0.08
Gm38220	0.00371	0.0134	2.91	2.91	0.37	0.13
Gm12059	0.00385	0.0138	2.27	2.27	0.78	0.35
Pzp	0.00388	0.0139	3.22	3.22	0.37	0.11
Il2rg	0.00392	0.0141	2.03	2.03	0.75	0.37
Grhl2	0.00392	0.0141	2.58	2.58	0.5	0.2
Gm31342	0.00398	0.0142	856.73	856.73	0.09	0
A530013C23Rik	0.00402	0.0143	3.61	3.61	0.43	0.12
8030451A03Rik	0.00404	0.0144	22.45	22.45	0.16	0.01
Yjefn3	0.00404	0.0144	2.41	2.41	0.92	0.38
Nos1	0.00409	0.0146	2.11	2.11	0.72	0.34
Col2a1	0.00425	0.0151	3.67	3.67	0.33	0.09
Olfr225	0.00427	0.0151	717.63	717.63	0.07	0
Gm10101	0.00429	0.0152	2.55	2.55	0.84	0.33
Cmpk2	0.00434	0.0153	2.47	2.47	0.44	0.18
1700061I17Rik	0.00435	0.0154	12.66	12.66	0.17	0.01
Pax8	0.00439	0.0155	3.53	3.53	0.28	0.08
6820426E19Rik	0.00444	0.0156	2.36	2.36	0.62	0.26
1700003E16Rik	0.00444	0.0156	4.66	4.66	0.19	0.04
Xrra1	0.00447	0.0157	2.49	2.49	0.49	0.19
A430108G06Rik	0.00449	0.0158	2.53	2.53	0.36	0.14
Gm16505	0.00449	0.0158	2.07	2.07	0.55	0.26
Gm20618	0.00455	0.016	588.53	588.53	0.06	0
Rorb	0.00456	0.016	2.21	2.21	0.83	0.37
Gm4764	0.00458	0.0161	595.16	595.16	0.06	0
D930015M05Rik	0.0046	0.0161	3.4	3.4	0.22	0.06
Il13ra2	0.00462	0.0162	3.66	3.66	0.23	0.06
Gm32857	0.00465	0.0162	2.53	2.53	0.58	0.23
1110002J07Rik	0.00466	0.0163	2.41	2.41	0.42	0.17
Gm2895	0.00466	0.0163	20.45	20.45	0.28	0.01
Myh7b	0.00468	0.0163	16.85	16.85	0.14	0.01
Gm28424	0.0047	0.0164	2.12	2.12	0.53	0.25
Rnf183	0.00473	0.0165	15.2	15.2	0.41	0.03
Slamf9	0.00479	0.0167	2.01	2.01	0.88	0.44
Gm42815	0.00481	0.0167	2.45	2.45	0.81	0.33
Aox4	0.00483	0.0168	90.89	90.89	0.08	0
Duoxa1	0.00484	0.0168	3.24	3.24	0.36	0.11
Olfr113	0.00485	0.0169	696.79	696.79	0.07	0
Gm42417	0.00487	0.0169	7.86	7.86	0.49	0.06
Kcnma1	0.00488	0.0169	4.89	4.89	0.21	0.04
Gm26651	0.0049	0.017	2.48	2.48	0.73	0.3
Pkp3	0.00491	0.017	3.21	3.21	0.4	0.12
Ropn1l	0.00495	0.0172	2.23	2.23	0.63	0.28
Gm9869	0.00497	0.0172	4.04	4.04	0.41	0.1
Gm37174	0.00499	0.0173	2.24	2.24	0.63	0.28
Gm47904	0.00503	0.0174	4.57	4.57	0.26	0.06
B130024G19Rik	0.00518	0.0178	4.04	4.04	0.39	0.1
Gm28892	0.0052	0.0179	601.84	601.84	0.06	0
Gucy2g	0.00522	0.0179	2.16	2.16	0.6	0.28
Gm9887	0.00532	0.0182	2.58	2.58	1.63	0.63
Gjc2	0.00536	0.0184	5.64	5.64	0.25	0.04
Shoc1	0.00542	0.0185	19.28	19.28	0.13	0.01
1700056E22Rik	0.00545	0.0186	2.28	2.28	0.94	0.41
Nppb	0.00548	0.0187	2.85	2.85	0.28	0.1
Usp17le	0.00549	0.0187	2.94	2.94	0.45	0.15
Necab2	0.00555	0.0189	2.05	2.05	0.65	0.32
Platr3	0.00564	0.0192	645.44	645.44	0.06	0
Gm16252	0.00566	0.0192	76.8	76.8	0.08	0
Gm29596	0.00566	0.0192	534.58	534.58	0.05	0
Gm32027	0.00566	0.0192	534.58	534.58	0.05	0
Hrh2	0.00572	0.0194	2.44	2.44	0.48	0.2
Gm49486	0.00574	0.0194	2.42	2.42	0.97	0.4
Gm29667	0.00589	0.0199	3.38	3.38	0.36	0.11
Ypel4	0.00589	0.0199	2.47	2.47	0.53	0.22
Krt33a	0.00607	0.0204	4.99	4.99	0.21	0.04
Gm38534	0.00618	0.0207	2.73	2.73	0.32	0.12
Wfikkn1	0.00621	0.0208	2.1	2.1	0.96	0.46
Pgf	0.00621	0.0208	2.26	2.26	0.76	0.34
Gm47992	0.00626	0.021	14.85	14.85	0.1	0.01
Gm15441	0.00632	0.0212	2.15	2.15	0.55	0.25
Gp1ba	0.00633	0.0212	2.94	2.94	0.52	0.18
Gm43366	0.00639	0.0213	3.75	3.75	0.28	0.08
Gm48306	0.00644	0.0215	3.78	3.78	0.32	0.09
Vwa2	0.00652	0.0217	4.62	4.62	0.22	0.05
Hvcn1	0.00652	0.0217	3.51	3.51	0.39	0.11
Gm1600	0.00661	0.022	4.16	4.16	0.29	0.07
Cd79a	0.00664	0.022	2.64	2.64	0.41	0.16
Cys1	0.00671	0.0222	535.88	535.88	0.05	0
Fam50b	0.00672	0.0222	7.29	7.29	0.15	0.02
Gm49785	0.00673	0.0223	2.19	2.19	0.45	0.2
Gm12033	0.00684	0.0226	3.18	3.18	0.76	0.24
Gm5129	0.00685	0.0226	14.13	14.13	0.1	0.01
Slc22a14	0.00688	0.0227	15.31	15.31	0.13	0.01
Islr2	0.00688	0.0227	3.39	3.39	0.32	0.1
Ido2	0.00691	0.0228	605.46	605.46	0.06	0
Gm20711	0.00692	0.0228	3.92	3.92	0.22	0.06
Gm15753	0.00697	0.023	2.67	2.67	0.4	0.15
AA467197	0.00702	0.0231	13.33	13.33	0.09	0.01
4933408J17Rik	0.00702	0.0231	12.6	12.6	0.09	0.01
Gm8464	0.00703	0.0231	7.32	7.32	0.26	0.03
Lrrn3	0.00704	0.0231	2.09	2.09	0.58	0.28
Fam163a	0.00705	0.0232	15.63	15.63	0.24	0.02
Gm10646	0.00713	0.0234	2.29	2.29	0.6	0.26
Mlc1	0.00713	0.0234	3.67	3.67	0.21	0.06
Vmn2r6	0.00716	0.0235	2.95	2.95	0.45	0.15
Pi15	0.0073	0.0238	2.03	2.03	0.49	0.24
1700055D18Rik	0.00732	0.0239	2.03	2.03	0.51	0.25
Il1rl1	0.00743	0.0242	2.73	2.73	0.27	0.1
AC118710.1	0.00745	0.0243	545.74	545.74	0.05	0
Gm49345	0.00756	0.0246	24.52	24.52	0.48	0.02
U90926	0.00759	0.0247	3.02	3.02	0.4	0.13
Gm47900	0.00759	0.0247	580.6	580.6	0.06	0
Nags	0.00774	0.0251	19.1	19.1	0.13	0.01
1700066B17Rik	0.00779	0.0252	3.86	3.86	0.17	0.04
Gbp5	0.00779	0.0252	2.07	2.07	0.42	0.2
Slc11a1	0.00782	0.0253	2.53	2.53	0.38	0.15
Gm32834	0.00787	0.0254	4.29	4.29	0.15	0.04
Zfp981	0.00794	0.0256	2.69	2.69	0.44	0.16
Pglyrp3	0.00797	0.0257	3.56	3.56	0.26	0.07
Mesp2	0.008	0.0258	14.13	14.13	0.1	0.01
Ankrd35	0.00805	0.0259	2.46	2.46	0.47	0.19
Lmtk3	0.00812	0.0261	2.32	2.32	0.71	0.31
Gm49959	0.00814	0.0261	458.43	458.43	0.05	0
Cilp2	0.00826	0.0265	3.94	3.94	0.43	0.11
Hecw2	0.00826	0.0265	2.49	2.49	0.68	0.27
Calcrl	0.00827	0.0265	2.25	2.25	0.41	0.18
Gpr156	0.00831	0.0266	2.27	2.27	0.41	0.18
5430425K12Rik	0.00831	0.0266	12.02	12.02	0.08	0.01
Gm48946	0.00833	0.0266	11.17	11.17	0.09	0.01
Zscan10	0.00837	0.0268	10.43	10.43	0.09	0.01
Sp5	0.0084	0.0268	2.84	2.84	0.61	0.21
Cd244a	0.00852	0.0272	3.61	3.61	0.22	0.06
3632454L22Rik	0.00862	0.0275	7.22	7.22	0.1	0.01
Gm15850	0.00864	0.0275	12.73	12.73	0.09	0.01
Gm20441	0.00866	0.0276	7.64	7.64	0.12	0.02
Otogl	0.00869	0.0276	12.31	12.31	0.09	0.01
Gm46349	0.00871	0.0277	2.02	2.02	1.03	0.51
Gm12879	0.00871	0.0277	2.5	2.5	0.38	0.15
Gm48014	0.00882	0.028	14.56	14.56	0.1	0.01
Mettl7b	0.00894	0.0283	11.05	11.05	0.23	0.02
Rem2	0.00896	0.0284	2.19	2.19	0.38	0.17
Gm2916	0.00898	0.0284	35.36	35.36	0.08	0
Lax1	0.00902	0.0285	2.71	2.71	0.52	0.19
Txlnb	0.00921	0.0291	2.1	2.1	0.47	0.22
4833427F10Rik	0.00926	0.0292	2	2	0.88	0.44
Gm50323	0.00929	0.0293	3.25	3.25	0.27	0.08
Gm37979	0.00932	0.0294	10.89	10.89	0.07	0.01
Gm18733	0.00934	0.0294	2.57	2.57	0.27	0.11
4632433K11Rik	0.00952	0.0299	658.75	658.75	0.1	0
4933433G15Rik	0.00955	0.03	6.89	6.89	0.1	0.01
Mx1	0.0096	0.0301	3.91	3.91	0.15	0.04
Gm26910	0.0097	0.0304	2.78	2.78	0.33	0.12
Gm17746	0.00975	0.0306	2.82	2.82	0.28	0.1
Inpp5d	0.00984	0.0308	3.49	3.49	0.26	0.07
Gna15	0.00985	0.0308	11.73	11.73	0.27	0.02
Olfr699	0.00998	0.0312	3.2	3.2	0.21	0.07
Gm12689	0.01	0.0312	14.3	14.3	0.1	0.01
Gm25000	0.01	0.0313	2.01	2.01	0.52	0.26
Rpl19-ps9	0.0101	0.0314	11.82	11.82	0.08	0.01
Gm17059	0.0101	0.0315	11.49	11.49	0.08	0.01
Dnase1l3	0.0101	0.0316	6.64	6.64	0.09	0.01
Gm42913	0.0102	0.0317	2.51	2.51	0.32	0.13
Eprn	0.0102	0.0317	3.41	3.41	0.34	0.1
Gm15473	0.0103	0.0319	2.23	2.23	0.57	0.26
Gm31683	0.0103	0.032	3.3	3.3	0.31	0.09
Gm49164	0.0103	0.0321	5.93	5.93	0.1	0.02
P2ry6	0.0103	0.0321	2.88	2.88	0.68	0.24
Gm33056	0.0104	0.0322	6.36	6.36	0.1	0.02
Gpr17	0.0104	0.0322	11.13	11.13	0.08	0.01
Gm8066	0.0104	0.0323	2.25	2.25	0.46	0.2
Ppp2r2c	0.0104	0.0323	11.99	11.99	0.18	0.01
Cdcp3	0.0106	0.0327	3.28	3.28	0.18	0.06
Mboat2	0.0106	0.0327	3.73	3.73	0.24	0.06
Gm13816	0.0107	0.033	2.59	2.59	0.37	0.14
Pglyrp2	0.0107	0.033	15.29	15.29	0.1	0.01
Colec10	0.0108	0.0332	3.43	3.43	0.18	0.05
5830428M24Rik	0.0109	0.0335	3.98	3.98	0.13	0.03
Platr6	0.0109	0.0336	3.68	3.68	0.23	0.06
Itga11	0.011	0.0338	2.88	2.88	0.41	0.14
Panx3	0.011	0.0338	9.06	9.06	0.07	0.01
Slc12a1	0.011	0.0339	2.52	2.52	0.45	0.18
Csf1r	0.011	0.0339	4.66	4.66	0.2	0.04
Arhgap9	0.011	0.0339	2.05	2.05	0.58	0.28
Gm44658	0.0111	0.034	2.85	2.85	0.39	0.14
Gm21284	0.0111	0.0341	2.3	2.3	0.53	0.23
Usp26	0.0112	0.0343	6.87	6.87	0.09	0.01
Arhgef37	0.0112	0.0344	2.26	2.26	0.32	0.14
Gm12996	0.0113	0.0345	11.07	11.07	0.09	0.01
Samsn1	0.0113	0.0345	6.83	6.83	0.08	0.01
Gm17068	0.0113	0.0346	2.42	2.42	0.3	0.12
Gm15384	0.0113	0.0347	372.06	372.06	0.04	0
Olfr628	0.0114	0.035	10.42	10.42	0.07	0.01
Hsd17b1	0.0115	0.0352	4.66	4.66	0.2	0.04
Gm13986	0.0116	0.0354	8.78	8.78	0.2	0.02
Gm42476	0.0116	0.0354	3.13	3.13	0.62	0.2
Pcdhga9	0.0116	0.0354	6.3	6.3	0.08	0.01
Mcpt1	0.0117	0.0356	10.91	10.91	0.07	0.01
Gm41664	0.0117	0.0357	9.53	9.53	0.07	0.01
Gm13613	0.0117	0.0357	2.02	2.02	0.54	0.26
2310002F09Rik	0.0118	0.0358	10.59	10.59	0.07	0.01
Gm17399	0.0118	0.0359	2	2	0.4	0.2
2810029C07Rik	0.0119	0.0362	2.34	2.34	0.46	0.2
Ccdc148	0.0119	0.0362	2.4	2.4	0.3	0.13
Ppp1r27	0.0121	0.0366	2.81	2.81	0.27	0.1
Slc44a4	0.0121	0.0366	4.45	4.45	0.11	0.02
A130071D04Rik	0.0121	0.0366	9.55	9.55	0.07	0.01
Oxct2a	0.0121	0.0367	2.94	2.94	0.36	0.12
Rps2-ps13	0.0121	0.0367	3.06	3.06	0.2	0.06
Gm17597	0.0123	0.037	2.07	2.07	0.38	0.18
4930435F18Rik	0.0123	0.0372	2.6	2.6	0.43	0.17
Apln	0.0125	0.0377	2.8	2.8	0.27	0.1
Gm37206	0.0126	0.0379	4.27	4.27	0.3	0.07
Tas1r1	0.0126	0.038	2	2	0.49	0.24
2210011K15Rik	0.0127	0.0383	2.31	2.31	0.61	0.27
Bloc1s2-ps	0.0128	0.0383	3.64	3.64	0.12	0.03
Clec2g	0.0128	0.0383	2.7	2.7	0.23	0.08
Oas1c	0.0129	0.0386	2.94	2.94	0.24	0.08
Gm7466	0.013	0.0389	2.71	2.71	0.27	0.1
F830016B08Rik	0.013	0.039	2.51	2.51	0.25	0.1
Cdkl1	0.0131	0.0392	2.12	2.12	0.42	0.2
2310008N11Rik	0.0131	0.0392	10	10	0.07	0.01
Lamb3	0.0133	0.0397	2.47	2.47	0.25	0.1
0610040F04Rik	0.0134	0.0399	5.43	5.43	0.07	0.01
Cyp2ab1	0.0134	0.04	2.73	2.73	0.13	0.05
Med9os	0.0134	0.0401	2.22	2.22	0.39	0.17
Aqp3	0.0135	0.0402	3.99	3.99	0.34	0.09
H2ac18	0.0135	0.0404	82.45	82.45	0.14	0
Gm12932	0.0136	0.0405	2.42	2.42	0.37	0.15
Gm35558	0.0137	0.0407	2.28	2.28	0.36	0.16
Synpo2l	0.0137	0.0408	2.86	2.86	0.32	0.11
Gm44992	0.0137	0.0409	5.47	5.47	0.08	0.01
Colq	0.0137	0.0409	9.14	9.14	0.06	0.01
Gm4876	0.0138	0.041	2.2	2.2	0.45	0.21
Slc25a34	0.0138	0.041	10.26	10.26	0.07	0.01
Gm26604	0.0138	0.041	2.93	2.93	0.21	0.07
Gm45472	0.0139	0.0413	2.54	2.54	0.27	0.1
Gm15527	0.0139	0.0413	10.19	10.19	0.07	0.01
Prl7a1	0.0139	0.0414	3.06	3.06	0.2	0.06
1700088E04Rik	0.014	0.0416	2.02	2.02	0.71	0.35
Slc34a2	0.0142	0.042	10.23	10.23	0.08	0.01
Il1a	0.0143	0.0424	9.82	9.82	0.13	0.01
Gm45548	0.0145	0.0428	8.85	8.85	0.06	0.01
Tgfbi	0.0145	0.0429	2.3	2.3	0.37	0.16
Aqp7	0.0146	0.043	2.03	2.03	0.47	0.23
Gm26579	0.0146	0.043	6.07	6.07	0.08	0.01
2310001H17Rik	0.0146	0.0431	2.84	2.84	0.29	0.1
Gm14176	0.0146	0.0432	3.81	3.81	0.78	0.2
Gm42748	0.0146	0.0432	2.23	2.23	0.56	0.25
Map3k19	0.0147	0.0432	6.52	6.52	0.2	0.03
Gal3st2	0.0147	0.0433	34.06	34.06	0.09	0
Cox7a1	0.0148	0.0435	2.04	2.04	0.44	0.22
Gm15409	0.0148	0.0436	5.1	5.1	0.08	0.02
Gm2270	0.0148	0.0437	9.02	9.02	0.07	0.01
1110018N20Rik	0.0149	0.0437	9.31	9.31	0.14	0.02
Gm45342	0.0149	0.0438	5.81	5.81	0.08	0.01
Bnip3l-ps	0.015	0.0439	2.72	2.72	0.86	0.32
Olfr1305	0.015	0.0441	3.34	3.34	0.14	0.04
Ppp1r2-ps6	0.0151	0.0441	4.84	4.84	0.07	0.02
AW112010	0.0151	0.0442	8.43	8.43	0.07	0.01
Apoa1	0.0151	0.0443	6.3	6.3	0.08	0.01
Gm20633	0.0151	0.0443	2.73	2.73	0.23	0.08
Fmnl2	0.0152	0.0444	3.9	3.9	0.08	0.02
Coro1a	0.0152	0.0444	2.85	2.85	0.26	0.09
Gm19519	0.0154	0.0449	8.41	8.41	0.06	0.01
Gja8	0.0154	0.045	9.19	9.19	0.06	0.01
Unc13c	0.0154	0.045	2.4	2.4	0.34	0.14
Gm48295	0.0155	0.0451	9.11	9.11	0.06	0.01
Gm38319	0.0155	0.0452	2.11	2.11	0.78	0.37
Gm2233	0.0156	0.0453	9.06	9.06	0.07	0.01
Cbx7	0.0156	0.0455	2.13	2.13	0.33	0.16
Snhg7os	0.0158	0.0459	4.01	4.01	0.1	0.02
Ptp4a3	0.0158	0.046	2.38	2.38	0.35	0.15
1200007C13Rik	0.0159	0.0461	2.16	2.16	0.5	0.23
Cma1	0.0159	0.0461	2.25	2.25	0.61	0.27
Gm26708	0.0159	0.0462	3.97	3.97	0.1	0.02
Gm42790	0.016	0.0463	8.67	8.67	0.12	0.01
Rnf208	0.016	0.0464	2.18	2.18	0.42	0.19
Krtap1-5	0.016	0.0464	3.9	3.9	0.22	0.06
Gm45226	0.0161	0.0466	8.18	8.18	0.17	0.02
Gm31410	0.0161	0.0466	2.15	2.15	0.4	0.19
Gm45304	0.0161	0.0466	6.98	6.98	0.19	0.03
Icam5	0.0161	0.0467	2.39	2.39	0.4	0.17
Gm30214	0.0162	0.0469	2.32	2.32	0.43	0.18
Klra2	0.0162	0.0469	9.51	9.51	0.26	0.03
Ccdc83	0.0163	0.0471	8.96	8.96	0.13	0.01
Cryaa	0.0164	0.0474	4.19	4.19	0.08	0.02
Hspb2	0.0164	0.0474	8.49	8.49	0.19	0.02
Papolb	0.0164	0.0475	9.39	9.39	0.19	0.02
1700030C14Rik	0.0165	0.0477	5.75	5.75	0.08	0.01
Gm11407	0.0166	0.0478	11.27	11.27	0.08	0.01
Myom1	0.0168	0.0483	2.49	2.49	0.63	0.25
Fcrl5	0.0168	0.0484	8.87	8.87	0.06	0.01
Gm47409	0.0168	0.0484	2.67	2.67	0.24	0.09
Gm2453	0.0168	0.0484	3.59	3.59	0.13	0.04
Mgat4c	0.0169	0.0485	3.04	3.04	0.19	0.06
Rapgef3os2	0.0169	0.0485	2.1	2.1	0.34	0.16
Gm21962	0.0169	0.0487	5.77	5.77	0.37	0.06
Gm9034	0.017	0.0488	2.09	2.09	0.4	0.19
Rsph14	0.0171	0.0489	2.57	2.57	0.26	0.1
Gm47654	0.0172	0.0492	5.23	5.23	0.83	0.16
Olfr1402	0.0173	0.0494	4.08	4.08	0.07	0.02
Gm8731	0.0174	0.0498	8.34	8.34	0.07	0.01
Gm34883	0.0175	0.05	7	7	0.06	0.01
