# Supplementary material for: Iron Chelation Therapy Elicits Innate Immune Control of Metastatic Ovarian Cancer
Source: Research Square preprint supplement (doi:10.21203/rs.3.rs-3399219/v1), 2023-10-25
Supplement: Supplementary file 2 [file e39759c98d8168737b0cf83c.pdf]

**Table S1**

| Ascites ID | Tumor type                      | Additional details                                                                         |
|------------|---------------------------------|--------------------------------------------------------------------------------------------|
| A12        | HGSOC                           | Chemotherapy naïve                                                                         |
| A13        | HGSOC                           | Chemotherapy naïve                                                                         |
| A16        | HGSOC                           | Chemotherapy naïve                                                                         |
| A17        | HGSOC                           | Chemotherapy naïve                                                                         |
| A19        | HGSOC                           | Chemotherapy naïve                                                                         |
| A20        | HGSOC                           | Chemotherapy naïve                                                                         |
| A21        | HGSOC                           | N/D                                                                                        |
| A22        | Mucinous ovarian cancer         | Mucinous stage 1C                                                                          |
| A23        | HGSOC                           | Patient with ovarian metastases after new adjuvant chemotherapy Platinum-resistant disease |
| A24        | Fallopian tube carcinoma        | Recurrent multidrug resistant disease                                                      |
| A25        | HGSOC                           | Recurrent ovarian cancer                                                                   |
| A26        | HGSOC                           | Recurrent peritoneal ovarian cancer. Multidrug resistant disease                           |
| A27        | Endometrial adenocarcinoma      | Recurrent endometrial cancer. Stage 4. Previously treated with taxol and carboplatin       |
| A28        | HGSOC                           | Chemotherapy naïve                                                                         |
| A29        | HGSOC                           | Chemotherapy naïve                                                                         |
| A30        | HGSOC                           | Chemotherapy naïve                                                                         |
| A33        | HGSOC                           | Chemotherapy naïve                                                                         |
| A35        | HGSOC                           | Chemotherapy naïve                                                                         |
| A38        | HGSOC                           | Chemotherapy naïve                                                                         |
| A39        | HGSOC                           | Chemotherapy naïve                                                                         |
| A40        | Adenocarcinoma                  | High-grade adenocarcinoma, likely of mullerian origin, that includes ovary and endometrium |
| A41        | HGSOC                           | N/D                                                                                        |
| A45        | HGSOC                           | Chemotherapy naïve                                                                         |
| A46        | Recurrent fallopian tube cancer | Heavily pre-treated. Recurrent disease.                                                    |
